# Supplementary material for: Mass Drug Administration to Reduce Malaria Transmission: A Systematic Review and Meta-Analysis
Source: PubMed Central journal article supplement (PMC10993786; doi:10.4269/ajtmh.22-0766), 2023-12-20

## Supplementary Data

### Mass drug administration for malaria transmission reduction: A systematic review and meta-analysis

Zachary D. Schneider, Monica P. Shah, Marisa C. Boily, Alexandra L. Busbee, Jimee Hwang, Kim A. Lindblade, Julie R. Gutman

#### Supplementary Table 1. Search strategy

**Search Name:** Cochrane Central Register of Controlled Trials

| ID | Search                                                                         |
|----|--------------------------------------------------------------------------------|
| #2 | "antimalarial":ti,ab,kw (Word variations have been searched)                   |
| #3 | malaria:ti,ab,kw (Word variations have been searched)                          |
| #4 | MeSH descriptor: [Malaria] explode all trees                                   |
| #5 | MeSH descriptor: [Antimalarials] explode all trees                             |
| #6 | #2 or #3 or #4 or #5                                                           |
| #7 | "mass chemoprophylaxis" or "mass drug administration" or "mass administration" |
| #8 | "mass screening and treatment"                                                 |
| #9 | "mass treatment"                                                               |

**Database: Embase 1947-Present, updated daily**

|    |                                                                                      |
|----|--------------------------------------------------------------------------------------|
| 1  | malaria/ or malaria control/                                                         |
| 2  | antimalarial agent/ or antimalarial*.mp.                                             |
| 3  | (malaria or antimalarial*).ab. or (malaria or antimalarial*).ti.                     |
| 4  | 1 or 2 or 3                                                                          |
| 5  | ("mass chemoprophylaxis" or "mass drug administration" or "mass administration").mp. |
| 6  | mass drug administration.mp.                                                         |
| 7  | mass treatment.mp.                                                                   |
| 8  | "mass screening and treatment".mp.                                                   |
| 9  | 5 or 6 or 7 or 8                                                                     |
| 10 | 4 and 9                                                                              |

**Pubmed Search history**

| Search | Query                                                                        |
|--------|------------------------------------------------------------------------------|
| #1     | malaria Field: Title/Abstract                                                |
| #2     | antimalarial*or anti-malarial* Field:Title/Abstract                          |
| #3     | (malaria[MeSH Terms]) OR antimalarials[MeSH Terms]                           |
| #4     | #1 or #2 or #3                                                               |
| #5     | ((mass chemoprophylaxis) OR mass drug administration) OR mass administration |

|     |                                                                        |
|-----|------------------------------------------------------------------------|
|     | Field:Title/Abstract                                                   |
| #6  | "mass screening and treatment" Field: Title/Abstract                   |
| #7  | (MDA[Title/Abstract] OR MSAT[Title/Abstract] OR iMSaT[Title/Abstract]) |
| #8  | mass drug administration[MeSH Terms]                                   |
| #9  | #5 or #6 or #7 or #8                                                   |
| #10 | #4 and #9                                                              |

Database : **LILACS**

|            |                                                                          |
|------------|--------------------------------------------------------------------------|
| Search on: | <b>malaria or antimalarial\$ [Words] and mass administration [Words]</b> |
|------------|--------------------------------------------------------------------------|

**Supplementary Table 2. List of studies excluded after full review and primary reasons for exclusion**

| Study             | #   | REASON FOR EXCLUSION                                                        | Title                                                                                                                                                                                                                      | Citation                              |
|-------------------|-----|-----------------------------------------------------------------------------|----------------------------------------------------------------------------------------------------------------------------------------------------------------------------------------------------------------------------|---------------------------------------|
| Bennett 2020      | 722 | Cross reference with outcomes; Linked to Eisele 2020 (#723)                 | A Longitudinal Cohort to Monitor Malaria Infection Incidence during Mass Drug Administration in Southern Province, Zambia                                                                                                  | 2020. AJTMH;103(2_Suppl):54-65        |
| Bennett 2016      | 61  | Duplicate; ASTMH abstract - duplicate of #722; Linked to Eisele 2020 (#723) | A longitudinal cohort to monitor malaria infection incidence in the context of a community randomized trial of mass drug administration in Southern Province, Zambia                                                       | 2016. AJTMH;95 (5 Supplement 1()):489 |
| Chishimba 2020    | 728 | No outcomes reported; Linked to Eisele 2020 (#723)                          | Prevalence of Plasmodium falciparum and Non-falciparum Infections by Photo-Induced Electron Transfer-PCR in a Longitudinal Cohort of Individuals Enrolled in a Mass Drug Administration Trial in Southern Province, Zambia | 2020. AJTMH;103(2_Suppl):82-89        |
| Daniels 2020      | 729 | No outcomes reported; Linked to Eisele 2020 (#723)                          | Evidence for Reduced Malaria Parasite Population after Application of Population-Level Antimalarial Drug Strategies in Southern Province, Zambia                                                                           | 2020. AJTMH;103(2_Suppl):66-73        |
| Finn 2016         | 60  | Duplicate; ASTMH abstract; Linked to Eisele 2020 (#723)                     | Treatment adherence to dihydroartemisinin-piperaquine during mass drug administration for malaria in Southern Province, Zambia                                                                                             | 2016. AJTMH;95 (5 Supplement 1()):284 |
| Finn 2020         | 727 | Cross reference with additional details; Linked to Eisele 2020 (#723)       | Treatment Coverage Estimation for Mass Drug Administration for Malaria with Dihydroartemisinin-Piperaquine in Southern Province, Zambia                                                                                    | 2020. AJTMH;103(2_Suppl):19-27        |
| Finn 2020         | 731 | Cross reference with additional details; Linked to Eisele 2020 (#723)       | Adherence to Mass Drug Administration with Dihydroartemisinin-Piperaquine and Plasmodium falciparum Clearance in Southern Province, Zambia                                                                                 | 2020. AJTMH;103(2_Suppl):37-45        |
| Galactionova 2020 | 713 | Provides Contextual Factors; linked to Eisele 2020 (723)                    | Costing malaria interventions from pilots to elimination programmes                                                                                                                                                        | 2020. Malaria journal;19(1):332       |
| Miller 2020       | 730 | No outcomes reported; linked to Eisele 2020 (723)                           | Moving from Malaria Burden Reduction toward Elimination: An Evaluation of Mass Drug Administration in Southern Province, Zambia                                                                                            | 2020. AJTMH;103(2_Suppl):44261        |
| Porter 2020       | 726 | Contextual Factors; linked to Eisele 2020 (723)                             | Recent Travel History and Plasmodium falciparum Malaria Infection in a Region of Heterogenous Transmission in Southern Province, Zambia                                                                                    | 2020. AJTMH;103(2_Suppl):74-81        |
| Scott 2015        | 36  | ASTMH abstract - duplicate of #725; Linked to Eisele 2020 (#723)            | Evaluating the costs of implementing a package of interventions and surveillance systems to support malaria elimination in southern province, zambia: A micro-costing analysis                                             | 2015. AJTMH;93 (4 Supplement()):268   |
| Silumbe 2020      | 720 | Provides contextual Factors only; linked to Eisele 2020 (723)               | Assessment of the Acceptability of Testing and Treatment during a Mass Drug Administration Trial for Malaria in Zambia Using Mixed Methods                                                                                 | 2020. AJTMH;103(2_Suppl):28-36        |
| Steketee 2020     | 724 | Cross reference with outcomes; linked to Eisele 2020 (723)                  | Implications of the MDA Trial in Southern Province, Zambia, for Malaria Control and Elimination                                                                                                                            | 2020. AJTMH;103(2_Suppl):98-101       |
| Yukich            | 725 | Contextual Factors; linked to Eisele 2020 (723)                             | Cost-Effectiveness of Focal Mass Drug Administration and Mass                                                                                                                                                              | 2020.                                 |

|                                      |            |                                                                                                  |                                                                                                                                                                                                                                                                 |                                                                                                             |
|--------------------------------------|------------|--------------------------------------------------------------------------------------------------|-----------------------------------------------------------------------------------------------------------------------------------------------------------------------------------------------------------------------------------------------------------------|-------------------------------------------------------------------------------------------------------------|
| 2020                                 |            |                                                                                                  | Drug Administration with Dihydroartemisinin-Piperaquine for Malaria Prevention in Southern Province, Zambia: Results of a Community-Randomized Controlled Trial                                                                                                 | AJTMH;103(2_Suppl):46-53                                                                                    |
| Anonymou<br>s 2017                   | 128        | No outcomes reported; linked to Eisele 2020 (723)                                                | Erratum: Short-term impact of mass drug administration with dihydroartemisinin plus piperaquine on malaria in southern province zambia: A cluster-randomized controlled trial                                                                                   | 2017. J Inf Dis;216(8):1048                                                                                 |
| Bever 2016                           | 67         | Contextual Factors; ASTMH abstract; linked to Eisele 2020 (723)                                  | Epidemiological and operational lessons learned from a malaria elimination campaign in zambia's lake kariba region                                                                                                                                              | 2016. AJTMH;95 (5 Supplement 1()):490                                                                       |
| Chalwe<br>2016                       | 57         | Cross reference with outcomes; ASTMH abstract; linked to Eisele 2020 (723)                       | Adverse event reporting from malaria mass drug administration rounds conducted in southern zambia                                                                                                                                                               | 2016. AJTMH;95 (5 Supplement 1()):487                                                                       |
| Chiyende<br>2016                     | 79         | Cross reference with outcomes; ASTMH abstract; linked to Eisele 2020 (723)                       | Targeted community sensitization to reduce anticipated refusals in malaria mass drug administration trial: Lessons learned from Southern Zambia                                                                                                                 | 2016. AJTMH;95 (5 Supplement 1()):485                                                                       |
| Conner<br>2017                       | 112        | No outcomes reported; ASTMH abstract; linked to Eisele 2020 (723)                                | Programmatic mass drug administration in southern province, Zambia: An evaluation of impact and possible spill-over effects using dhis2 malaria case incidence data                                                                                             | 2017. AJTMH;97 (5 Supplement 1()):501                                                                       |
| Dieye 2017                           | 111        | Contextual Factors; linked to Eisele 2020 (723)                                                  | Malaria elimination: Engaging communities through nationwide campaigns                                                                                                                                                                                          | 2017. AJTMH;97 (5 Supplement 1()):592                                                                       |
| Eisele 2015                          | 448        | Cross reference with additional details; linked to Eisele 2020 (723)                             | Assessing the effectiveness of household-level focal mass drug administration and community-wide mass drug administration for reducing malaria parasite infection prevalence and incidence in Southern Province, Zambia: study protocol for a community randomi | 2015. Trials;16():347                                                                                       |
| Eisele 2015                          | 40         | Duplicate; ASTMH abstract - duplicate of #488; linked to Eisele 2020 (723)                       | The impact of targeted mass drug administration using dihydroartemisinin-piperaquine in southern province Zambia: Initial findings                                                                                                                              | 2015. AJTMH;93 (4 Supplement()):83                                                                          |
| Eisele 2016                          | 488        | Cross reference with outcomes; linked to Eisele 2020 (723)                                       | Short-term Impact of Mass Drug Administration With Dihydroartemisinin Plus Piperaquine on Malaria in Southern Province Zambia: A Cluster-Randomized Controlled Trial                                                                                            | 2016. J Inf Dis;214(12):1831-1839                                                                           |
| Eisele 2017<br>Galactiono<br>va 2019 | 108<br>179 | Duplicate; ASTMH abstract, linked to Eisele 2020 (723)<br>Duplicate; linked to Eisele 2020 (723) | The long-term durability of mass drug administration using dihydroartemisinin-piperaquine as part of a comprehensive malaria elimination strategy in Southern province zambia<br>From pilots to an elimination program: How much do malaria interventions cost  | 2017. AJTMH;97 (5 Supplement 1()):309<br>2019. AJTMH;101 (5 Supplement()):512-513<br>2014.                  |
| Nct 2014                             | 275        | Cross reference with additional details; linked to Eisele 2020 (723)                             | Mass Drug Administration With Dihydroartemisinin + Piperaquine for Reducing Malaria in Southern Zambia                                                                                                                                                          | <a href="https://clinicaltrials.gov/show/NCT02329301">https://clinicaltrials.gov/show/NCT02329301</a> ();() |
| Silumbe<br>2016                      | 81         | Contextual Factors; ASTMH abstract; linked to Eisele 2020 (723)                                  | Transitioning an evidence-based malaria mass drug administration (MDA) research strategy to program/routine mode: Factors for consideration                                                                                                                     | 2016. AJTMH;95 (5 Supplement 1()):487                                                                       |
| Silumbe<br>2019                      | 173        | Duplicate; ASTMH abstract- data duplicated in #723; linked to Eisele 2020 (723)                  | Reductions in malaria burden through the use of a scalable intervention package (SIP) in accordance with the Zambia                                                                                                                                             | 2019. AJTMH;101 (5 Supplement()):524                                                                        |

|                   |     |                                                                                                                                                                                                      |                                                                                                                                                                                                                    |                                           |
|-------------------|-----|------------------------------------------------------------------------------------------------------------------------------------------------------------------------------------------------------|--------------------------------------------------------------------------------------------------------------------------------------------------------------------------------------------------------------------|-------------------------------------------|
|                   |     |                                                                                                                                                                                                      | national malaria elimination strategic plan 2017-2021: The case of Mulobezi district in Western Province                                                                                                           |                                           |
| Stuckey<br>2016   | 467 | Modelling data; linked to Eisele 2020 (723)                                                                                                                                                          | Operational strategies of anti-malarial drug campaigns for malaria elimination in Zambia's southern province: a simulation study                                                                                   | 2016. Malaria journal;15():148            |
| Suresh<br>2018    | 139 | No outcomes reported; ASTMH abstract; linked to Eisele 2020 (723)                                                                                                                                    | Stratification of malaria transmission dynamics and optimal intervention packages in Zambia and Mozambique                                                                                                         | 2018. AJTMH;99 (4 Supplement)():357-358   |
| Suresh<br>2019    | 190 | No outcomes reported; linked to Eisele 2020 (723)                                                                                                                                                    | Choosing the right tool for the job: Estimating effect sizes for multiple overlapping interventions in Southern Province, Zambia                                                                                   | 2019. AJTMH;101 (5 Supplement)():416      |
| Wenger<br>2013    | 384 | No outcomes reported; ASTMH abstract ; linked to Eisele 2020 (723)                                                                                                                                   | Modeling for malaria control and elimination scenario planning: Application of the epidemiological modeling (EMOD) malaria disease transmission kernel to community-based intervention delivery in Southern Zambia | 2013. AJTMH;1()():396                     |
| Wenger<br>2014    | 401 | No outcomes reported; linked to Eisele 2020 (723)                                                                                                                                                    | Spatial dynamics of malaria transmission in the EMOD model for campaigns targeting sustained regional elimination in Southern Zambia                                                                               | 2014. AJTMH;1()():14                      |
| Fraser<br>2020    | 739 | Design: insufficient data points for ITS; ITS analysis of programmatic rounds of MDA. However, IRS partially implemented at the same time as MDA, so insufficient data points to evaluate MDA alone; | Evaluating the impact of programmatic mass drug administration for malaria in Zambia using routine incidence data                                                                                                  | 2020. J Inf Dis;():                       |
| Mancuso<br>2019   | 189 | Cross reference with outcomes; linked to only #739 (Fraser 2020); ASTMH abstract                                                                                                                     | Ongoing assessment of plasmodium falciparum parasite prevalence in southern province Zambia: Results from a 2019 parasite survey three years after a mass drug administration trial                                | 2019. AJTMH;101 (5 Supplement)():216      |
| Adhikari<br>2017  | 526 | Contextual Factors; linked to vonSeidlein 2019 (596)                                                                                                                                                 | Elements of effective community engagement: lessons from a targeted malaria elimination study in Lao PDR (Laos)                                                                                                    | 2017. Global health action;10(1):1366136  |
| Adhikari<br>2017  | 530 | Contextual Factors; linked to vonSeidlein 2019 (596)                                                                                                                                                 | Factors associated with population coverage of targeted malaria elimination (TME) in southern Savannakhet Province, Lao PDR                                                                                        | 2017. Malaria journal;16(1):424           |
| Adhikari<br>2018  | 538 | Contextual Factors; linked to vonSeidlein 2019 (596)                                                                                                                                                 | Why do people participate in mass anti-malarial administration? Findings from a qualitative study in Nong District, Savannakhet Province, Lao PDR (Laos)                                                           | 2018. Malaria journal;17(1):15            |
| Adhikari<br>2018  | 593 | Contextual Factors; linked to vonSeidlein 2019 (596)                                                                                                                                                 | Perceptions of asymptomatic malaria infection and their implications for malaria control and elimination in Laos                                                                                                   | 2018. PloS one;13(12):e0208912            |
| Chaumeau<br>2019  | 616 | Cross reference with outcomes; linked to vonSeidlein 2019 (596)                                                                                                                                      | Contribution of Asymptomatic Plasmodium Infections to the Transmission of Malaria in Kayin State, Myanmar                                                                                                          | 2019. J Inf Dis;219(9):1499-1509          |
| Imwong<br>2020    | 199 | Cross reference with outcomes; linked to vonSeidlein 2019 (596)                                                                                                                                      | Molecular epidemiology of resistance to antimalarial drugs in the Greater Mekong subregion: an observational study                                                                                                 | 2020. The Lancet Infectious Diseases.;(): |
| Kajechiwa<br>2016 | 482 | Contextual Factors; linked to vonSeidlein 2019 (596)                                                                                                                                                 | The acceptability of mass administrations of anti-malarial drugs as part of targeted malaria elimination in villages along the Thai-Myanmar border                                                                 | 2016. Malaria journal;15(1):494           |
| Kajechiwa<br>2017 | 661 | Contextual Factors; linked to vonSeidlein 2019 (596)                                                                                                                                                 | Community engagement for the rapid elimination of malaria: the case of Kayin State, Myanmar                                                                                                                        | 2017. Wellcome open research;2():59       |
| Landier<br>2016   | 72  | Cross reference with outcomes; linked to vonSeidlein 2019 (596)                                                                                                                                      | Relative contribution of generalized early diagnosis and treatment and of targeted mass treatment to elimination of                                                                                                | 2016. AJTMH;95 (5 Supplement 1)():382     |

|                 |     |                                                                           |                                                                                                                                                                                                                                   |                                                                                                                  |
|-----------------|-----|---------------------------------------------------------------------------|-----------------------------------------------------------------------------------------------------------------------------------------------------------------------------------------------------------------------------------|------------------------------------------------------------------------------------------------------------------|
| Landier 2017    | 662 | Cross reference with outcomes; linked to vonSeidlein 2019 (596)           | plasmodium falciparum malaria in eastern myanmar<br>Safety and effectiveness of mass drug administration to accelerate elimination of artemisinin-resistant falciparum malaria: A pilot trial in four villages of Eastern Myanmar | 2017. Wellcome open research;2():81                                                                              |
| Li 2019         | 186 | No outcomes reported; linked to vonSeidlein 2019 (596)                    | Spatial analysis of parasite population genomics during malaria elimination efforts in Eastern Myanmar                                                                                                                            | 2019. AJTMH;101 (5 Supplement):597                                                                               |
| Nct 2013        | 278 | Cross reference with additional details; linked to vonSeidlein 2019 (596) | Targeted Chemo-elimination (TCE) of Malaria                                                                                                                                                                                       | 2013. <a href="https://clinicaltrials.gov/show/NCT01872702">https://clinicaltrials.gov/show/NCT01872702</a> ;(): |
| Nguyen 2017     | 497 | Contextual Factors; linked to vonSeidlein 2019 (596)                      | Community perceptions of targeted anti-malarial mass drug administrations in two provinces in Vietnam: a quantitative survey                                                                                                      | 2017. Malaria journal;16(1):17                                                                                   |
| Parker 2019     | 598 | Cross reference with outcomes; linked to vonSeidlein 2019 (596)           | Potential herd protection against Plasmodium falciparum infections conferred by mass antimalarial drug administrations                                                                                                            | 2019. eLife;8():                                                                                                 |
| Pell 2017       | 511 | Contextual Factors; linked to vonSeidlein 2019 (596)                      | Mass anti-malarial administration in western Cambodia: a qualitative study of factors affecting coverage                                                                                                                          | 2017. Malaria journal;16(1):206                                                                                  |
| Pell 2019       | 597 | Contextual Factors; linked to vonSeidlein 2019 (596)                      | Community engagement, social context and coverage of mass anti-malarial administration: Comparative findings from multi-site research in the Greater Mekong sub-Region                                                            | 2019. PloS one;14(3):e0214280                                                                                    |
| Peto 2018       | 537 | Contextual Factors; linked to vonSeidlein 2019 (596)                      | Reflections on a Community Engagement Strategy for Mass Antimalarial Drug Administration in Cambodia                                                                                                                              | 2018. AJTMH;98(1):100-104                                                                                        |
| Peto 2018       | 539 | Contextual Factors; linked to vonSeidlein 2019 (596)                      | Community participation during two mass anti-malarial administrations in Cambodia: lessons from a joint workshop                                                                                                                  | 2018. Malaria journal;17(1):53                                                                                   |
| Peto 2018       | 588 | Contextual Factors; linked to vonSeidlein 2019 (596)                      | The feasibility and acceptability of mass drug administration for malaria in Cambodia: a mixed-methods study                                                                                                                      | 2018. Trans Royal Soc Trop Med Hyg;112(6):264-271                                                                |
| Phommasone 2020 | 624 | Cross reference with outcomes; linked to vonSeidlein 2019 (596)           | Mass drug administrations with dihydroartemisinin-piperazine and single low dose primaquine to eliminate Plasmodium falciparum have only a transient impact on Plasmodium vivax: Findings from randomised controlled trials       | 2020. PloS one;15(2):e0228190                                                                                    |
| Pongvongsa 2018 | 559 | Cross reference with outcomes; linked to vonSeidlein 2019 (596)           | The dynamic of asymptomatic Plasmodium falciparum infections following mass drug administrations with dihydroartemisinin-piperazine plus a single low dose of primaquine in Savannakhet Province, Laos                            | 2018. Malaria journal;17(1):405                                                                                  |
| Sahan 2017      | 500 | Contextual Factors; linked to vonSeidlein 2019 (596)                      | Community engagement and the social context of targeted malaria treatment: a qualitative study in Kayin (Karen) State, Myanmar                                                                                                    | 2017. Malaria journal;16(1):75                                                                                   |
| Tangseefa 2018  | 705 | Contextual Factors; linked to vonSeidlein 2019 (596)                      | "Nine Dimensions": A multidisciplinary approach for community engagement in a complex postwar border region as part of the targeted malaria elimination in Karen/Kayin State, Myanmar                                             | 2018. Wellcome open research;3():116                                                                             |
| Tripura 2018    | 1   | Cross reference with outcomes; linked to vonSeidlein 2019 (596)           | A Controlled Trial of Mass Drug Administration to Interrupt Transmission of Multidrug-Resistant Falciparum Malaria in Cambodian Villages                                                                                          | 2018. Clin Inf Dis;67(6):817-826                                                                                 |

|                  |     |                                                                                                   |                                                                                                                                                                                                                                           |                                         |
|------------------|-----|---------------------------------------------------------------------------------------------------|-------------------------------------------------------------------------------------------------------------------------------------------------------------------------------------------------------------------------------------------|-----------------------------------------|
| Tun 2017         | 533 | No outcomes reported; linked to vonSeidlein 2019 (596)                                            | Towards malaria elimination in Savannakhet, Lao PDR: mathematical modelling driven strategy design                                                                                                                                        | 2017. Malaria journal;16(1):483         |
| vonSeidlein 2019 | 619 | No outcomes reported; linked to vonSeidlein 2019 (596)                                            | The probability of a sequential Plasmodium vivax infection following asymptomatic Plasmodium falciparum and P. vivax infections in Myanmar, Vietnam, Cambodia, and Laos                                                                   | 2019. Malaria journal;18(1):449         |
| Mwesigwa 2019    | 631 | Design: control group criteria not met; not designed as ITS; no control group and outcomes are pf | Mass Drug Administration With Dihydroartemisinin-piperazine and Malaria Transmission Dynamics in The Gambia: A Prospective Cohort Study                                                                                                   | 2019. Clin Inf Dis;69(2):278-286        |
| Mwesigwa 2016    | 74  | Cross reference with outcomes; ASTMH abstract - full publication is #631                          | Impact of mass drug administration with dihydroartemisinin-piperazine on malaria transmission in a highly seasonal transmission setting in the gambia                                                                                     | 2016. AJTMH;95 (5 Supplement 1()):382   |
| Mwesigwa 2017    | 103 | Cross reference with outcomes; ASTMH abstract - full publication is Mwesigwa 2019 (#631)          | Impact of two annual cycles of mass drug administration on temporal trends of clinical malaria                                                                                                                                            | 2017. AJTMH;97 (5 Supplement 1()):411   |
| Mwesigwa 2018    | 152 | Duplicate; ASTMH abstract - full publication is Mwesigwa 2019 (#631)                              | Impact of mass treatment with dihydroartemisinin piperazine on malaria transmission dynamics in the Gambia: A prospective study                                                                                                           | 2018. AJTMH;99 (4 Supplement()):126     |
| Mwesigwa 2019    | 609 | No outcomes reported; full publication is Mwesigwa 2019 (#631)                                    | Field performance of the malaria highly sensitive rapid diagnostic test in a setting of varying malaria transmission                                                                                                                      | 2019. Malaria journal;18(1):288         |
| Dierickx 2015    | 47  | Duplicate; ASTMH abstract - full publication is #464; linked Mwesigwa 2019 (#631)                 | Community barriers for the implementation of a mass drugs administration for malaria in the Gambia                                                                                                                                        | 2015. AJTMH;93 (4 Supplement()):197     |
| Dierickx 2016    | 464 | Contextual Factors; linked to Mwesigwa 2019 (#631)                                                | Factors Associated with Non-Participation and Non-Adherence in Directly Observed Mass Drug Administration for Malaria in The Gambia                                                                                                       | 2016. PloS one;11(2):e0148627           |
| Dial 2014        | 671 | Contextual Factors; linked to 631- Mwesigwa 2019 (631)                                            | <b>A qualitative study to assess community barriers to malaria mass drug administration trials in The Gambia</b>                                                                                                                          | 2014. Malaria journal;13():47           |
| Siling 2016      | 73  | Contextual Factors; ASTMH abstract; linked to Mwesigwa 2019 (631)                                 | Ignoring people 'who are not there' may mitigate success of mass drug administration for malaria: Findings from a mixed-method study in the gambia                                                                                        | 2016. AJTMH;95 (5 Supplement 1()):7     |
| Wu 2018          | 136 | No outcomes reported; ASTMH abstract                                                              | Validating novel serological markers of malaria exposure: Evaluating the effect of mass drug administration (MDA) and seasonal malaria chemoprevention (SMC) on transmission in rural Gambia based on population-level antibody responses | 2018. AJTMH;99 (4 Supplement()):321-322 |
| Aguas 2018       | 552 | No outcomes reported                                                                              | Infectivity of Chronic Malaria Infections and Its Consequences for Control and Elimination                                                                                                                                                | 2018. Clin Inf Dis;67(2):295-302        |
| Ali 2017         | 522 | Contextual Factors                                                                                | Artemisinin combination therapy mass drug administration in a setting of low malaria endemicity: programmatic coverage and adherence during an observational study in Zanzibar                                                            | 2017. Malaria journal;16(1):332         |
| Archibald 1960   | 894 | Intervention: not MDA                                                                             | A preliminary report on the effect of diamino-diphenyl sulphone on malaria in northern Nigeria                                                                                                                                            | 1960. J Trop Med Hyg;63():25-7          |
| Archibald 1960   | 895 | Design: control group criteria not met                                                            | Field trials of mass administration of antimalarial drugs in Northern Nigeria                                                                                                                                                             | 1960. ;262():44207                      |
| Archibald        | 896 | Cross reference with outcomes; Linked to #895                                                     | The appearance of P. falciparum resistant to pyrimethamine in a                                                                                                                                                                           | 1960. West Afr Med                      |

|                     |     |                                                                                                                                                     |                                                                                                                                                              |                                                                                                         |
|---------------------|-----|-----------------------------------------------------------------------------------------------------------------------------------------------------|--------------------------------------------------------------------------------------------------------------------------------------------------------------|---------------------------------------------------------------------------------------------------------|
| Aregawi 2016        | 481 | (Design: control group criteria not met)<br>Setting: emergencies/epidemics                                                                          | northern Nigerian village<br>Impact of the Mass Drug Administration for malaria in response to the Ebola outbreak in Sierra Leone                            | J;9():21-5<br>2016. Malaria journal;15():480<br>1984. Journal of Communicable Diseases;16(4):268-272    |
| Baukapur 1984       | 787 | Setting: emergencies/epidemics                                                                                                                      | A focal outbreak of malaria in Valsad District, Gujarat State                                                                                                | 2017. AJTMH;97 (5 Supplement 1)():522-523                                                               |
| Bertozzi-Villa 2017 | 120 | Modelling data: ABSTRACT ONLY                                                                                                                       | Impact of human migration patterns on malaria elimination feasibility in the greater mekong subregion                                                        | 1982. R.I.I.M;11(2):119-124<br>1973. Revista del Instituto de Investigaciones medicas;2(1):51-54, 55-57 |
| Bloch 1982          | 786 | Intervention: Insufficient information on drug administration;                                                                                      | Teachings of the Antimalarial Campaign in El Salvador, Central America                                                                                       | 1977. Bulletin of the Pan American Health Organization;11(1):17-30                                      |
| Mason 1973          | 765 | Intervention: Insufficient information on drug administration; linked to Bloch 1982                                                                 | A study of the epidemiology of malaria in a high-incidence coastal area of El Salvador, C. A                                                                 | 1973. Revista del Instituto de Investigaciones medicas;2(1):31-39, 3-30                                 |
| Mason 1977          | 766 | Intervention: No data on drug dose available: linked to Bloch 1982 (786)                                                                            | Malaria field studies in a high-incidence coastal area of El Salvador, C.A                                                                                   | 2019. AJTMH;101 (5 Supplement)():510                                                                    |
| NaveRebollo 1973    | 763 | Intervention: not enough data in main article for ITS, no control group; Insufficient information on drug administration Linked to Bloch 1982 (786) | Malaria in El Salvador. Control and eradication campaign analysis                                                                                            | 2017. The Lancet. Global health;5(7):e680-e687                                                          |
| Boni 2019           | 174 | No outcomes reported;                                                                                                                               | Antimalarial drug-resistance evolution during and after mass drug administration                                                                             | 2017. Malaria journal;16(1):341                                                                         |
| Brady 2017          | 514 | Modelling data;                                                                                                                                     | Role of mass drug administration in elimination of Plasmodium falciparum malaria: a consensus modelling study                                                | 2020. PLoS medicine;17(8):e1003227                                                                      |
| Bretscher 2017      | 523 | Modelling data;                                                                                                                                     | Modelling the benefits of long-acting or transmission-blocking drugs for reducing Plasmodium falciparum transmission by case management or by mass treatment | 2019. AJTMH;101 (5 Supplement)():417                                                                    |
| Galatas 2020        | 635 | Design: imbalance of interventions; blanket IRS began at same time as MDA                                                                           | A multiphase program for malaria elimination in southern Mozambique (the Magude project): A before-after study                                               | 2017. AJTMH;97 (5 Supplement 1)():501                                                                   |
| Galatas 2019        | 193 | Duplicate; ASTMH abstract of publication #635 Galatas 2020                                                                                          | The magude project: Drastic reduction of malaria burden and sustained gains after a malaria elimination project in Southern Mozambique                       | 2020. PLoS one;15(7):e0235631                                                                           |
| Brew 2017           | 115 | Duplicate; ABSTRACT; linked to Galatas 2020 (635)                                                                                                   | The economic and educational impacts of a malaria elimination campaign in Mozambique                                                                         | 2017. Trop Med Int Health;22 (Supplement 1)():55                                                        |
| Cirera 2020         | 634 | Contextual Factors; linked to 635, Galatas 2020                                                                                                     | Moving towards malaria elimination in southern Mozambique: Cost and cost-effectiveness of mass drug administration combined with intensified malaria control | 1943. Naval Medical Bulletin;41(6):1603-12                                                              |
| Briet 2017          | 96  | No outcomes reported;                                                                                                                               | Modelling to support the planning of malaria elimination in southern Palawan, the Philippines                                                                | 2004. Bol. malariol. salud                                                                              |
| Butler 1943         | 783 | No outcomes reported;                                                                                                                               | Malaria Control Program on a South Pacific Base                                                                                                              |                                                                                                         |
| Caceres             | 893 | Cross reference with additional details; linked to                                                                                                  | Eficacia de la cura radical masiva en la incidencia malárica del                                                                                             |                                                                                                         |



|                         |     |                                                                                                                |                                                                                                                                                                                                                             |                                                                                                                                                                                                            |
|-------------------------|-----|----------------------------------------------------------------------------------------------------------------|-----------------------------------------------------------------------------------------------------------------------------------------------------------------------------------------------------------------------------|------------------------------------------------------------------------------------------------------------------------------------------------------------------------------------------------------------|
| 2004<br>Caceres<br>2005 | 891 | Caceres 2005, 2008 (included)<br>Cross reference with additional details; linked to<br>Caceres 2008 (included) | Municipio Marino, Estado Sucre<br>Impacto de la Cura Radical Masiva sobre la incidencia malárica<br>del estado Sucre, Venezuela                                                                                             | ambient;():45-49<br>2005. Bol. Malarinol. Salud<br>Amb;45():27-36                                                                                                                                          |
| Camponov<br>o 2019      | 615 | Modelling data;                                                                                                | Mass campaigns combining antimalarial drugs and anti-infective<br>vaccines as seasonal interventions for malaria control, elimination<br>and prevention of resurgence: a modelling study                                    | 2019. BMC infectious<br>diseases;19(1):920<br>1949. Bulletin de la<br>Societe de Pathologie<br>Exotique;42(44322):165-8<br>1949. Bulletin de la<br>Societe de Pathologie<br>Exotique;42(44322):165-<br>168 |
| Canet 1949              | 781 | No outcomes reported                                                                                           | First Trials in Southern Indo-China of Mass Prophylaxis of Malaria<br>with Nivaquine B (Resoquinle) and with Paludrine                                                                                                      | 1961. ;():<br>1903. Annali di Igiene<br>Sperimentale;13():322-343<br>1914. Ann.<br>dâ€™Ingine;24(2):177-<br>243                                                                                            |
| Canet 1949<br>Cavalié   | 844 | Duplicate; 781 Canet 1949                                                                                      | First trials in souther Indo-China of mass prophylaxis of malaria<br>with Nivaquine B (resoquinle) and with Paludrine.                                                                                                      | 1961. ;():<br>1903. Annali di Igiene<br>Sperimentale;13():322-343<br>1914. Ann.<br>dâ€™Ingine;24(2):177-<br>243                                                                                            |
| 1961                    | 890 | Design: <2 areas/clusters per group                                                                            | La campagne expelérimentale d'elradication du paludisme dans<br>le Nord de la Relpublique du Cameroun                                                                                                                       | 1961. ;():<br>1903. Annali di Igiene<br>Sperimentale;13():322-343<br>1914. Ann.<br>dâ€™Ingine;24(2):177-<br>243                                                                                            |
| Celli 1903              | 859 | Design: control group criteria not met                                                                         | La malaria in Italia durante il 1902. Parte II: Profilassi della<br>malaria. [Malaria in Italy in 1902. Part II: Prophylaxis of Malaria]                                                                                    | 1961. ;():<br>1903. Annali di Igiene<br>Sperimentale;13():322-343<br>1914. Ann.<br>dâ€™Ingine;24(2):177-<br>243                                                                                            |
| Celli 1914<br>Snowden   | 843 | No outcomes reported                                                                                           | [English title not available.]                                                                                                                                                                                              | 2006. ;():                                                                                                                                                                                                 |
| 2006                    | 799 | Cross reference; linked to Celli 1914 (843)                                                                    | Conquest of malaria: Italy, 1900-1962.<br>Results of a pilot of targeted mass drug administration with<br>sulfadoxine-pyrimethamine and primaquine as a component of a<br>malaria elimination package in Haiti              | 2006. ;():                                                                                                                                                                                                 |
| Chang<br>2019           | 192 | Design: control group criteria not met                                                                         | Accounting for human mobility in malaria elimination programs<br>with heterogeneous travel data                                                                                                                             | 2019. AJTMH;101 (5<br>Supplement)():417<br>2019. AJTMH;101 (5<br>Supplement)():189                                                                                                                         |
| Chang<br>2019           | 182 | No outcomes reported                                                                                           | Designing malaria elimination strategies to achieve high<br>community uptake: Findings from a formative research study in<br>the department of Grand Anse, Haiti                                                            | 2019. AJTMH;101 (5<br>Supplement)():417<br>2019. AJTMH;101 (5<br>Supplement)():189                                                                                                                         |
| Andrinopo<br>ulos 2016  | 78  | Contextual Factors; Linked to Chang 2019 (192);<br>control group criteria not met                              | Reduction in malaria prevalence in sentinel populations following<br>introduction of a package of interventions for malaria elimination:<br>Results from easy access group surveys in 2017 and 2018,<br>Grande-Anse (Haiti) | 2016. AJTMH;95 (5<br>Supplement 1)():485                                                                                                                                                                   |
| Druetz<br>2019          | 171 | Cross reference with outcomes; linked to Chang 2019                                                            | Malaria Elimination in Costa Rica: Changes in Treatment and Mass<br>Drug Administration                                                                                                                                     | 2019. AJTMH;101 (5<br>Supplement)():523<br>2020.<br>Microorganisms;8(7):<br>2019. Trends in<br>parasitology;35(8):585-<br>588                                                                              |
| Chaves<br>2020          | 712 | No outcomes reported; Include for qualitative<br>synthesis. No control group, vivax only                       | Parasite Removal for Malaria Elimination in Costa Rica                                                                                                                                                                      | 2019. Trends in<br>parasitology;35(8):585-<br>588                                                                                                                                                          |
| MarinRodri<br>guez 2019 | 627 | Linked to Chaves 2020                                                                                          | Antimalarial mass drug administration: ethical considerations<br>[A pilot study on malaria control by using a new strategy of                                                                                               | 2016. International<br>health;8(4):235-8<br>1999. Chung-Kuo Chi                                                                                                                                            |
| Cheah<br>2016           | 478 | Contextual Factors;                                                                                            |                                                                                                                                                                                                                             |                                                                                                                                                                                                            |
| Chen 1999               | 780 | Intervention: not MDA; Tx not administered to entire                                                           |                                                                                                                                                                                                                             |                                                                                                                                                                                                            |

|                               |            |                                                                                                                        |                                                                                                                                                                                                                                            |                                                                                                                                                                                                                                                                                                                                                                                                                                                                                                                                                                                                                                                                                                                                                                                                                                                                                                        |
|-------------------------------|------------|------------------------------------------------------------------------------------------------------------------------|--------------------------------------------------------------------------------------------------------------------------------------------------------------------------------------------------------------------------------------------|--------------------------------------------------------------------------------------------------------------------------------------------------------------------------------------------------------------------------------------------------------------------------------------------------------------------------------------------------------------------------------------------------------------------------------------------------------------------------------------------------------------------------------------------------------------------------------------------------------------------------------------------------------------------------------------------------------------------------------------------------------------------------------------------------------------------------------------------------------------------------------------------------------|
|                               |            | population                                                                                                             | combining strengthening infection source treatment and health education in mountainous areas of Hainan province]                                                                                                                           | Sheng Chung Hsueh Yu Chi<br>Sheng Chung Ping Tsa Chih<br>Chinese Journal of<br>Parasitology & Parasitic<br>Diseases;17(1):44200<br>2017.<br><a href="http://www.who.int/trials">http://www.who.int/trials</a><br>earch/Trial2.aspx?TrialID=<br>ChiCTR-EON-17010697;():<br>2019. AJTMH;101 (5<br>Supplement()):511<br>1937. Archives Roumaines<br>de Pathologie<br>Experimentale et de<br>Microbiologie;10(3):295-<br>306<br>1958. East African Medical<br>Journal;35(1):23-9<br>1961. East African Medical<br>Journal;38(2):69-82<br>1961. East African Medical<br>Journal;38(1):27-42<br>1961. East Afr Med<br>J;38():69-82<br>1996. Trans R Soc Trop<br>Med Hyg;90(2):100-2<br>2018. Clin Inf<br>Dis;67(11):1670-1676<br>1987. Trans Royal Soc Trop<br>Med Hyg;81(1):175-176<br>1961. East Afr Med<br>J;38():44222<br>1983. Dakar<br>Medical;28(1):43-65<br>2016. AJTMH;95 (5<br>Supplement 1()):381 |
| Chi 2017<br>Citron<br>2019    | 669<br>175 | Awaiting classification; This study does not yet appear to have been published.<br>No outcomes reported; Abstract only | Protocol of the Project of Malaria Elimination in the Plateaux Region of the Togolese Republic (Sino-Togolese Cooperation) Quantifying malaria acquired during travel and its role in malaria elimination on Bioko Island                  |                                                                                                                                                                                                                                                                                                                                                                                                                                                                                                                                                                                                                                                                                                                                                                                                                                                                                                        |
| Ciuca 1937                    | 840        | Design: control group criteria not met<br>Intervention: exclude as targeted MDA (sent to emergency settings review)    | Experimental control of malaria with synthetic drugs. Single Dose Pyrimethamine Treatment of Africans during a Malaria Epidemic in Tanganyika                                                                                              |                                                                                                                                                                                                                                                                                                                                                                                                                                                                                                                                                                                                                                                                                                                                                                                                                                                                                                        |
| Clyde 1958                    | 777        |                                                                                                                        | Malaria Control in Tanganyika under the German Administration. Part II. Mass Chcmoprophylaxis in Dar es Salaam                                                                                                                             |                                                                                                                                                                                                                                                                                                                                                                                                                                                                                                                                                                                                                                                                                                                                                                                                                                                                                                        |
| Clyde 1961                    | 778        | Contextual Factors;                                                                                                    | Malaria Control in Tanganyika under the German Administration. Part I                                                                                                                                                                      |                                                                                                                                                                                                                                                                                                                                                                                                                                                                                                                                                                                                                                                                                                                                                                                                                                                                                                        |
| Clyde 1961                    | 779        | Cross reference with additional details; Linked to 778 Clyde 1961                                                      | Malaria control of Tanganyika under the German Administration. II. Mass chemoprophylaxis in Dar es Salaam                                                                                                                                  |                                                                                                                                                                                                                                                                                                                                                                                                                                                                                                                                                                                                                                                                                                                                                                                                                                                                                                        |
| Clyde 1961<br>Dapeng<br>1996  | 838<br>774 | Duplicate; Linked to 778 Clyde 1961<br>Design: No pre-intervention data or control;                                    | A successful control programme for falciparum malaria in Xinyang, China                                                                                                                                                                    |                                                                                                                                                                                                                                                                                                                                                                                                                                                                                                                                                                                                                                                                                                                                                                                                                                                                                                        |
| Deng 2018<br>Desowitz<br>1987 | 591<br>834 | Design: control group criteria not met; not designed as ITS; no control group<br>Intervention: not MDA;                | Large-scale Artemisinin-Piperaquine Mass Drug Administration With or Without Primaquine Dramatically Reduces Malaria in a Highly Endemic Region of Africa<br>Malaria in the Maprik area of the Sepik region, Papua New Guinea: 1957â€“1984 |                                                                                                                                                                                                                                                                                                                                                                                                                                                                                                                                                                                                                                                                                                                                                                                                                                                                                                        |
| DeZulueta<br>1961             | 888        | Design: control group criteria not met; Pf, no control, only 1 area                                                    | The results of the first year of a malaria eradication pilot project in Northern Kigezi (Uganda)                                                                                                                                           |                                                                                                                                                                                                                                                                                                                                                                                                                                                                                                                                                                                                                                                                                                                                                                                                                                                                                                        |
| Diallo 1983                   | 833        | Intervention: not MDA; Treatment not administered to entire population                                                 | Clinical consequences of chloroquine prophylaxis and of its discontinuation in an hyperendemic malarial region                                                                                                                             |                                                                                                                                                                                                                                                                                                                                                                                                                                                                                                                                                                                                                                                                                                                                                                                                                                                                                                        |
| Diallo 2016                   | 70         | Design: control group criteria not met                                                                                 | Targetting malaria hotspots in senegal: Results of a cluster-randomized trial                                                                                                                                                              |                                                                                                                                                                                                                                                                                                                                                                                                                                                                                                                                                                                                                                                                                                                                                                                                                                                                                                        |
| Diallo 2014                   | 408        | Cross reference with additional details; linked to Diallo 2016                                                         | A cluster-randomized trial of targeted control to eliminate malaria in central Senegal: Study design and acceptability of the interventions                                                                                                |                                                                                                                                                                                                                                                                                                                                                                                                                                                                                                                                                                                                                                                                                                                                                                                                                                                                                                        |
| Diallo 2015                   | 32         | Cross reference with outcomes; linked to Diallo 2016                                                                   | A cluster-randomized trial of targeted control to eliminate malaria in central Senegal: Main results in year 2                                                                                                                             |                                                                                                                                                                                                                                                                                                                                                                                                                                                                                                                                                                                                                                                                                                                                                                                                                                                                                                        |

|               |     |                                                                                                                                             |                                                                                                                                                                                                                                                                  |                                                                                            |
|---------------|-----|---------------------------------------------------------------------------------------------------------------------------------------------|------------------------------------------------------------------------------------------------------------------------------------------------------------------------------------------------------------------------------------------------------------------|--------------------------------------------------------------------------------------------|
|               |     |                                                                                                                                             |                                                                                                                                                                                                                                                                  | 2013.<br>http://www.who.int/trials<br>earch/Trial2.aspx?TrialID=<br>PACTR201310000575267;( |
| Pactr 2013    | 276 | Cross reference with additional details; trial registration; linked to Diallo 2016 (70)                                                     | A trial of targetted control to eliminate malaria in Central Senegal                                                                                                                                                                                             | ):                                                                                         |
| Tairou 2015   | 33  | Contextual Factors; linked to Diallo 2016 (70)                                                                                              | The costs and cost-effectiveness of two spatially targeted, multi-component malaria elimination strategies: Results of a large three-arm cluster-randomized trial in rural Senegal                                                                               | 2015. AJTMH;93 (4 Supplement):81                                                           |
| Dolenz 2013   | 378 | No outcomes reported; This is an abstract, doesn't appear to be very relevant for modelling outcomes and has not been published.            | Assessing cost optimized strategies for maintaining and extending the gains against malaria                                                                                                                                                                      | 2013. AJTMH;1():262                                                                        |
| Dupoux 1937   | 773 | No outcomes reported;                                                                                                                       | Mass Prophylaxis of Malaria in Tunis                                                                                                                                                                                                                             | 1937. Bull. Acad. Med.;118(35):368-372 pp.                                                 |
| Echodu 2018   | 149 | Design: <2 areas/clusters per group; Excluded because each arm has a n=1                                                                    | Mass drug administration combined with indoor residual spraying for accelerated reduction of malaria in a high transmission setting in northeastern Uganda: Preliminary results                                                                                  | 2018. AJTMH;99 (4 Supplement):580                                                          |
| Wanzira 2018  | 563 | Contextual Factors; linked to Echodu 2018                                                                                                   | Community facilitators and barriers to a successful implementation of mass drug administration and indoor residual spraying for malaria prevention in Uganda: a qualitative study                                                                                | 2018. Malaria journal;17(1):474                                                            |
| Elliott 2018  | 549 | No outcomes reported; A modeling study that does not compare outcomes according to operational design considerations; linked to Echodu 2018 | Medical and entomological malarial interventions, a comparison and synergy of two control measures using a Ross/Macdonald model variant and openmalaria simulation                                                                                               | 2018. Mathematical biosciences;300():187-200                                               |
| Elliott 2019  | 571 | No outcomes reported; linked to Echodu 2018                                                                                                 | Synergy and timing: a concurrent mass medical campaign predicted to augment indoor residual spraying for malaria                                                                                                                                                 | 2019. Malaria journal;18(1):160                                                            |
| Mulebeke 2018 | 145 | Duplicate; ASTMH abstract; linked to Echodu 2018                                                                                            | Implementing malaria mass drug administration: Experience from a high transmission setting in northeastern uganda                                                                                                                                                | 2018. AJTMH;99 (4 Supplement):575                                                          |
| Mulebeke 2019 | 582 | Contextual Factors; linked to Echodu 2018 (149)                                                                                             | Implementing population-based mass drug administration for malaria: experience from a high transmission setting in North Eastern Uganda                                                                                                                          | 2019. Malaria journal;18(1):271                                                            |
| Escudie 1961  | 750 | Design: <2 areas/clusters per group; See Escudie 1962                                                                                       | [Results of 2 years of antimalarial chemoprophylaxis in the rural African area in the pilot zone of Bobo Dioulasso (Haute Volta)]                                                                                                                                | 1961. Med Trop (Mars);21(Special):689-728                                                  |
| Escudie 1962  | 751 | Cross reference with additional details linked to Escudie 1961                                                                              | Results of mass antimalarial chemoprophylaxis with a combination of 4-aminoquinoline and 8-aminoquinoline under rural African conditions in the region of Bobo-Dioulasso (Upper Volta) 1960. Comparative study in a zone treated with DDT and outside this zone. | 1962. Medecine Tropicale;22(2):268-305                                                     |
| Ricosse 1959  | 870 | Design: <2 areas/clusters per group;                                                                                                        | Results of pyrimethamine chemoprophylaxis in a pilot antimalarial prevention study in Boboâ€Dioulasso [Resultats d'une experimentation de chimioprophylaxie par la pyrimethamine dans la zone pilote de lutte antipaludique de Boboâ€Dioulasso]                | 1959. Bulletin de la Societe de Pathologie Exotique;52():516â€35                          |

|                          |     |                                                                                                                                                                                       |                                                                                                                                                                                                                                                                                                 |                                                                    |
|--------------------------|-----|---------------------------------------------------------------------------------------------------------------------------------------------------------------------------------------|-------------------------------------------------------------------------------------------------------------------------------------------------------------------------------------------------------------------------------------------------------------------------------------------------|--------------------------------------------------------------------|
| Farinaud<br>1934         | 831 | Intervention: not MDA                                                                                                                                                                 | [English title not available] [Essai de prophylaxie rationelle du paludisme en milieu infantile a Tri-Cu (Tonkin)].                                                                                                                                                                             | 1934. Bulletin de la Societe de Pathologie Exotique;627(6):568-575 |
| Farinaud<br>1958         | 898 | Intervention: not MDA                                                                                                                                                                 | Rapport sur les conditions d'organisation d'une campagne d'eradicacion due paludisme en Tunisie                                                                                                                                                                                                 | 1958. ;(EM/MAL/33):                                                |
| Finda 2019               | 178 | Irrelevant, no discussion of MDA                                                                                                                                                      | Perspectives of key stakeholders in Tanzania on alternative technologies for malaria elimination                                                                                                                                                                                                | 2019. AJTMH;101 (5 Supplement()):124                               |
| Gao 2020                 | 647 | Modelling data;<br>Setting: emergencies/epidemics:<br><a href="https://academic.oup.com/ofid/article/6/7/ofz250/5498323">https://academic.oup.com/ofid/article/6/7/ofz250/5498323</a> | Determinants of MDA impact and designing MDAs towards malaria elimination                                                                                                                                                                                                                       | 2020. eLife;9():                                                   |
| Garbern<br>2018          | 134 |                                                                                                                                                                                       | Effect of mass artesunate-amodioquine distribution on Ebola-related mortality in Sierra Leone                                                                                                                                                                                                   | 2018. AJTMH;99 (4 Supplement()):303                                |
| Garcia<br>2004           | 884 | Cross reference with outcomes; no control, only 1 pre-intervention time point                                                                                                         | Estado Sucre: El Axitoxito antimalarico de Venezuela en el año 2003                                                                                                                                                                                                                             | 2004. Boletin de Malariologia y Salud Ambiental;44(1):51-5         |
| Garfield<br>1983         | 883 | Imbalance of background interventions;                                                                                                                                                | Changes in malaria incidence after mass drug administration in Nicaragua                                                                                                                                                                                                                        | 1983. The Lancet;322(8348):500-503                                 |
| Garfield<br>1986         | 882 | Contextual Factors; linked to Garfield 1983 (883)                                                                                                                                     | Health education and community participation in mass drug administration for malaria in Nicaragua                                                                                                                                                                                               | 1986. Soc Sci Med;22(8):869-77                                     |
| Gerardin<br>2015         | 245 | Modelling data;                                                                                                                                                                       | Mass campaigns with antimalarial drugs: a modelling comparison of artemether-lumefantrine and DHA-piperaquine with and without primaquine as tools for malaria control and elimination                                                                                                          | 2015. BMC infectious diseases;15():144                             |
| Gerardin<br>2016         | 462 | Modelling data;                                                                                                                                                                       | Optimal Population-Level Infection Detection Strategies for Malaria Control and Elimination in a Spatial Model of Malaria Transmission                                                                                                                                                          | 2016. PLoS computational biology;12(1):e1004707                    |
| Gerardin<br>2018         | 545 | Modelling data;                                                                                                                                                                       | Impact of mass drug administration campaigns depends on interaction with seasonal human movement                                                                                                                                                                                                | 2018. International health;10(4):252-257                           |
| Gomez<br>Mendoza<br>1960 | 830 | No outcomes reported                                                                                                                                                                  | Observations on the programme for the employment of antimalarial drugs in the malaria eradication campaign in Venezuela.                                                                                                                                                                        | 1960. CNEP Boletin;4(2):74-81                                      |
| Gomez<br>Mendoza<br>1960 | 858 | Duplicate; 830                                                                                                                                                                        | Observations on the Programme for the Employment of Antimalarial Drugs in the Malaria Eradication Campaign in Venezuela [Informe del viaje efectuado para observar el programa de utilizaci3n de drogas antipal3dicas en la campaa de erradicaci3n del paludismo en la Rep3blica de Venezuela.] | 1960. CNEP Boletin;4():74-81                                       |
| Gunther<br>1952          | 828 | Intervention: not MDA                                                                                                                                                                 | Proguanil and malaria among non-tolerant New Guinea natives. Effect of mass dihydroartemisinin-piperaquine administration in southern Mozambique on the carriage of molecular markers of antimalarial resistance                                                                                | 1952. Trans Royal Soc Trop Med Hyg;46(2):185-200                   |
| Gupta 2020               | 716 | Design: insufficient data points for ITS                                                                                                                                              | Prophylaxis of malaria in the Sudan, with special reference to the                                                                                                                                                                                                                              | 2020. PloS one;15(10):e0240174                                     |
| Henderson                | 827 | Intervention: not tx dose; 1 area divided into 2 parts.                                                                                                                               |                                                                                                                                                                                                                                                                                                 | 1934. Trans Royal Soc Trop                                         |

|              |     |                                                                                                                                                                                 |                                                                                                                                                                                                             |                                                                   |
|--------------|-----|---------------------------------------------------------------------------------------------------------------------------------------------------------------------------------|-------------------------------------------------------------------------------------------------------------------------------------------------------------------------------------------------------------|-------------------------------------------------------------------|
| 1934         |     | No clear data on prevalence pre-Treatment<br>Design: control group criteria not met; MDA+ nets vs C: MDA. Does not meet design criteria but may have info on contextual factors | use of plasmoquine<br>The influence of permethrin-impregnated bednets and mass drug administration on the incidence of Plasmodium falciparum malaria in children in Sabah, Malaysia                         | Med Hyg;28(2):157-164<br>1987. Med Vet Entomol;1(4):397-407       |
| Hii 1987     | 880 |                                                                                                                                                                                 |                                                                                                                                                                                                             | 1965. Chinese Medical Journal;84(8):491-497 pp.                   |
| Ho 1965      | 770 | No outcomes reported                                                                                                                                                            | Studies on malaria in new China                                                                                                                                                                             | 1945. Bulletin de la Societe de Pathologie Exotique;47(2):254-260 |
| Houel 1945   | 825 | Intervention: not MDA                                                                                                                                                           | Chemoprophylaxis of malaria with monthly doses of chloroquine and amodiaquine.                                                                                                                              | 1954. Bulletin de la Societe de Pathologie Exotique;47(2):262-4   |
| Houel 1954   | 879 | Intervention: not MDA                                                                                                                                                           | Treatment of Epidemic-Malaria with a Single Dose of Pyrimethamine<br>Mass drug administration for the control and elimination of Plasmodium vivax malaria: an ecological study from Jiangsu province, China | 2013. Malaria journal;12():383                                    |
| Hsiang 2013  | 233 | Design: No pre-intervention data or control<br>Cross reference with outcomes; Linked Hsiang 2013 (233)                                                                          | Preparation of malaria resurgence in China: case study of vivax malaria re-emergence and outbreak in Huang-Huai Plain in 2006                                                                               | 2014. Advances in parasitology;86():205-30                        |
| Zhang 2014   | 690 |                                                                                                                                                                                 | Experience with an insecticide-drug combination and observations on suppressive chloroquine-pyrimethamine treatment                                                                                         | 1971. J Trop Med Hyg;74(5):110-6                                  |
| Huehne 1971  | 824 | Design: control group criteria not met; uncontrolled. Only 1 site. Pf                                                                                                           | Etiudes Epidemiologiques & Prophylactiques Sur Le Paludisme en Tunisie                                                                                                                                      | 1906. ;():                                                        |
| Husson 1906  | 897 | Intervention: not MDA                                                                                                                                                           | Resistance of P. falciparum and P. malariae to Pyrimethamine (Daraprim) following Mass Treatment with this Drug. A Preliminary Note                                                                         | 1954. East African medical journal;31(2):47-9                     |
| Jones 1954   | 878 | Cross reference with outcomes; Linked to Jones 1958 (included)                                                                                                                  | The promise, problems and pitfalls of mass drug administration for malaria elimination: a qualitative study with scientists and policymakers                                                                | 2019. International health;11(3):166-176                          |
| Kaehler 2019 | 589 | Contextual Factors;                                                                                                                                                             | Malaria resurgence after significant reduction by mass drug administration on Ngodhe Island, Kenya                                                                                                          | 2019. Scientific reports;9(1):19060                               |
| Kagaya 2019  | 642 | Design: <2 areas/clusters per group                                                                                                                                             | The impact of mass drug administration on submicroscopic malaria infection: A pilot study on ngodhe island in lake victoria, kenya                                                                          | 2017. AJTMH;97 (5 Supplement 1)():101                             |
| Kagaya 2017  | 100 | Duplicate; ASTMH abstract - duplicate of publication #642 (Kagaya 2019)                                                                                                         | High and Heterogeneous Prevalence of Asymptomatic and Sub-microscopic Malaria Infections on Islands in Lake Victoria, Kenya                                                                                 | 2016. Scientific reports;6():36958                                |
| Idris 2016   | 485 | No outcomes reported; linked to 642 (Kagaya 2019)                                                                                                                               |                                                                                                                                                                                                             | 2000. Lancet;356(9241):1560-4                                     |
| Kaneko 2000  | 748 | Imbalance of background interventions                                                                                                                                           | Malaria eradication on islands<br>Island malaria control in eastern Melanesia: 1) Malaria eliminated from a small island by 9-week mass drug administration and impregnated bednets                         | 1994. J Japan. J. Parasitol.;43():358-370                         |
| Kaneko 1994  | 876 | Duplicate; linked to Kaneko 2000                                                                                                                                                | A community-directed strategy for sustainable malaria elimination on islands: short-term MDA integrated with ITNs and                                                                                       | 2010. Acta Trop;114(3):177-83                                     |
| Kaneko 2010  | 823 | Contextual Factors; linked to Kaneko 2000                                                                                                                                       |                                                                                                                                                                                                             |                                                                   |

|                   |     |                                                                  |                                                                                                                                                                                                                     |                                                                                            |
|-------------------|-----|------------------------------------------------------------------|---------------------------------------------------------------------------------------------------------------------------------------------------------------------------------------------------------------------|--------------------------------------------------------------------------------------------|
|                   |     |                                                                  | robust surveillance                                                                                                                                                                                                 |                                                                                            |
| Kaneko<br>2014    | 407 | Duplicate; linked to Kaneko 2000                                 | Sustainable malaria elimination on aneityum Island, vanuatu, 1991-2014                                                                                                                                              | 2014. AJTMH;1()():197                                                                      |
| Kaneko<br>2014    | 399 | Cross reference with outcomes; Kaneko 2000                       | Community-directed malaria freedom on Aneityum Island, Vanuatu, 1991-2014                                                                                                                                           | 2014. Malaria Journal;1()():S25<br>2015. Trop Med Int Health;1()():105                     |
| Karl<br>2015      | 440 | Modelling data;                                                  | Mathematical models for P. vivax elimination                                                                                                                                                                        |                                                                                            |
| Kasereka<br>2014  | 404 | Setting: emergencies/epidemics;                                  | Malaria case-finding and treatment strategies in an internally displaced persons (IDP) camp in the democratic republic of Congo                                                                                     | 2014. AJTMH;1()():105                                                                      |
| Khaing<br>2016    | 75  | Awaiting classification; abstract only;                          | Evaluation of targeted mass treatment of malaria in tanintharyi region, myanmar: Preliminary results                                                                                                                | 2016. AJTMH;95 (5 Supplement 1)():401                                                      |
| Kligler<br>1931   | 874 | Design: control group criteria not met;                          | Periodic Intermittent Treatment with Chinoplasmine as a Measure of Malaria Control in a Hyperendemic Area                                                                                                           | 1931. Riv Malariol;10(4):<br>2020. Clinical pharmacology and therapeutics;107(5):1221-1230 |
| Kobylnski<br>2020 | 652 | Intervention: not MDA;                                           | Safety, Pharmacokinetics, and Mosquito-Lethal Effects of Ivermectin in Combination With Dihydroartemisinin-Piperaquine and Primaquine in Healthy Adult Thai Subjects                                                |                                                                                            |
| Kuehne<br>2015    | 439 | Setting: emergencies/epidemics; abstract                         | Malaria prevalence decreased following mass drug administration of malaria chemoprevention during the Ebola outbreak, Monrovia, Liberia, 2014                                                                       | 2015. Trop Med Int Health;1()():43-44                                                      |
| Kuehne<br>2016    | 480 | Setting: emergencies/epidemics                                   | Impact and Lessons Learned from Mass Drug Administrations of Malaria Chemoprevention during the Ebola Outbreak in Monrovia, Liberia, 2014                                                                           | 2016. PloS one;11(8):e0161311                                                              |
| Kyaw<br>2019      | 176 | Contextual Factors; abstract only, no data at all included here  | Costing mass drug administration with different targeting strategies                                                                                                                                                | 2019. AJTMH;101 (5 Supplement)():123                                                       |
| Landier<br>2018   | 607 | Design: control group criteria not met                           | Effect of generalised access to early diagnosis and treatment and targeted mass drug administration on Plasmodium falciparum malaria in Eastern Myanmar: an observational study of a regional elimination programme | 2018. Lancet (London, England);391(10133):1916-1926                                        |
| Levenson<br>1943  | 819 | Design: No pre-intervention data or control                      | Experiences in the control of a malarial focus in the north (Arehangel RĀ©gion) by mass chemoprophylaxis and systemic treatment of malaria patients (Russian).                                                      | 1943. Meditsinskaya Parazitologiya i Parazitarnya Bolezni;12():23-38                       |
| Liu<br>1986       | 818 | Intervention: not tx dose; mixed curative and prophylactic dose; | INTEGRATED APPROACH IN MALARIA CONTROL INCLUDING ENVIRONMENTAL MANAGEMENT TO REDUCE MAN-MOSQUITO CONTACT AND REDUCTION OF INFECTION SOURCE IN HUANGHUI PLAIN                                                        | 1986. CHINESE JOURNAL OF PARASITOLOGY AND PARASITIC DISEASES;4(4):246-250                  |
| Lwin<br>2015      | 449 | Design: control group criteria not met;                          | Elimination of Plasmodium falciparum in an area of multi-drug resistance                                                                                                                                            | 2015. Malaria journal;14()():319                                                           |
| Lysenko<br>1960   | 817 | No outcomes reported;                                            | Use of quinocide in treatment and prophylaxis of vivax malaria                                                                                                                                                      | 1960. Bull World Health Organ;22(6):641-62                                                 |
| Muhlen<br>1913    | 810 | Intervention: not MDA;                                           | Report of a malaria expedition to Jerusalem.                                                                                                                                                                        | 1913. Zentrablatt fur                                                                      |

|                    |     |                                                                                                                                                                                                                                                      |                                                                                                                                                                                                                                             |                                                                   |
|--------------------|-----|------------------------------------------------------------------------------------------------------------------------------------------------------------------------------------------------------------------------------------------------------|---------------------------------------------------------------------------------------------------------------------------------------------------------------------------------------------------------------------------------------------|-------------------------------------------------------------------|
| Sok 2016           | 71  | Intervention: not MDA                                                                                                                                                                                                                                | Comparison of mass drug administration vs. mass screening and treatment high-risk, military mobile populations to support malaria elimination in Cambodia                                                                                   | 2016. AJTMH;95 (5 Supplement 1)():381                             |
| Wojnarski 2016     | 86  | Cross reference with outcomes; MAIN: Sok 2016 (71)                                                                                                                                                                                                   | Primaquine safety in G6PD-deficient military cohort in Cambodia using the lower-dose, extended course regimen as part of mass drug administration for malaria elimination                                                                   | 2016. AJTMH;95 (5 Supplement 1)():281                             |
|                    | 18  | Cross reference with additional details; Linked to Sok 2016 (71)                                                                                                                                                                                     | Malaria Elimination Pilot Study in Military Forces in Cambodia                                                                                                                                                                              | . ;():                                                            |
| Manning 2018       | 558 | Cross reference with additional details; linked to Sok 2016                                                                                                                                                                                          | Cluster-randomized trial of monthly malaria prophylaxis versus focused screening and treatment: a study protocol to define malaria elimination strategies in Cambodia                                                                       | 2018. Trials;19(1):558                                            |
| Manning 2018       | 668 | Duplicate 558                                                                                                                                                                                                                                        | Cluster-randomized trial of monthly malaria prophylaxis versus focused screening and treatment: a study protocol to define malaria elimination strategies in Cambodia 11 Medical and Health Sciences 1117 Public Health and Health Services | 2018. Trials;19(1) (no pagination):                               |
| Marasinghe 2020    | 205 | Intervention: not MDA;                                                                                                                                                                                                                               | Mass radical treatment of a group of foreign workers to mitigate the risk of re-establishment of malaria in Sri Lanka                                                                                                                       | 2020. Malaria Journal;19 (1) (no pagination)(346):                |
| Maude 2012         | 215 | Modelling data; Kim Lindblade (2021-02-19 23:24:39)(Select): This is linked to Song 2010 #863, which is the main paper.; Monica Shah (2021-02-15 10:04:15)(Select): Update: this study is not linked to others. Screen this as an independent study; | Optimising strategies for Plasmodium falciparum malaria elimination in Cambodia: primaquine, mass drug administration and artemisinin resistance                                                                                            | 2012. PloS one;7(5):e37166                                        |
| Maude 2014         | 685 | Modelling data;                                                                                                                                                                                                                                      | The diminishing returns of atovaquone-proguanil for elimination of Plasmodium falciparum malaria: modelling mass drug administration and treatment                                                                                          | 2014. Malaria journal;13():380                                    |
| Maude 2016         | 65  | No outcomes reported;                                                                                                                                                                                                                                | Mathematical modelling of tafenoquine for Plasmodium falciparum malaria elimination                                                                                                                                                         | 2016. AJTMH;95 (5 Supplement 1)():305                             |
| Mendez Galvan 1984 | 764 | Intervention: can't determine when rounds occurred. 3 rounds, monthly, uncontrolled study for pv                                                                                                                                                     | Evaluation of alternative scheme of treatment for malaria control                                                                                                                                                                           | 1984. Salud Publica de Mexico;26(6):561-572                       |
| Mendez Galvan 1984 | 813 | Duplicate: 764                                                                                                                                                                                                                                       | Evaluation of alternative scheme of treatment for malaria control.                                                                                                                                                                          | 1984. Salud Publica de Mexico;26(6):561-572                       |
| Merle 1955         | 812 | Intervention: not MDA: Treatment not administered to entire population.                                                                                                                                                                              | [English title not available] [Problemas actuales del control y erradicacion de la malaria en America Latina].                                                                                                                              | 1955. Bulletin de la Societe de Pathologie Exotique;48(2):242-269 |
| Millar 2020        | 733 | No outcomes reported;                                                                                                                                                                                                                                | To screen or not to screen: an interactive framework for comparing costs of mass malaria treatment interventions                                                                                                                            | 2020. BMC medicine;18(1):149                                      |

|                               |     |                                                                                                                                                                                                                                                    |                                                                                                                                               |                                                                                        |
|-------------------------------|-----|----------------------------------------------------------------------------------------------------------------------------------------------------------------------------------------------------------------------------------------------------|-----------------------------------------------------------------------------------------------------------------------------------------------|----------------------------------------------------------------------------------------|
| Millat-Martinez 2018          | 557 | Intervention: not MDA                                                                                                                                                                                                                              | Electrocardiographic Safety of Repeated Monthly Dihydroartemisinin-Piperaquine as a Candidate for Mass Drug Administration                    | 2018. Antimicrobial agents and chemotherapy;62(12):                                    |
| Mosha 2013                    | 229 | Intervention: not MDA;                                                                                                                                                                                                                             | Epidemiology of subpatent Plasmodium falciparum infection: implications for detection of hotspots with imperfect diagnostics                  | 2013. Malaria journal;12():221                                                         |
| Murta 2019                    | 576 | Contextual Factors;                                                                                                                                                                                                                                | Misperceptions of patients and health workers regarding malaria elimination in the Brazilian Amazon: a qualitative study                      | 2019. Malaria journal;18(1):223                                                        |
| Najera 1973                   | 746 | Imbalance of background interventions;                                                                                                                                                                                                             | Mass drug administration and DDT indoor-spraying as antimalarial measures in the norther savanna of Nigeria                                   | 1973. World Health Organization;73(817):1242 0                                         |
| Nankabirwa 2019               | 185 | Modelling data;                                                                                                                                                                                                                                    | Quantifying the potential impact of mass drug administration on the parasite reservoir in an area of declining malaria transmission in Uganda | 2019. AJTMH;101 (5 Supplement)():316-317                                               |
| Nct 2016                      | 274 | Registration for Morris 2018 (562) which was included Intervention: not MDA; Protocol only. MDA Ivermectin + DP, no DP alone arm:                                                                                                                  | Effectiveness of Mass Drug Administration for Reducing Seasonal Malaria Transmission in Zanzibar                                              | https://clinicaltrials.gov/show/NCT02721186();): 2016.                                 |
| Nct 2018 Nikolov 2015         | 267 | https://pubmed.ncbi.nlm.nih.gov/33211022/;                                                                                                                                                                                                         | Mass Drug Administration of Ivermectin and Dihydroartemisinin-piperaquine as an Additional Intervention for Malaria Elimination               | https://clinicaltrials.gov/show/NCT03576313();): 2018.                                 |
| Norman 1952                   | 447 | No outcomes reported; Abstract only                                                                                                                                                                                                                | Modeling the effectiveness of population-level malaria infection detection strategies for optimal campaign scoping                            | 2015. AJTMH;93 (4 Supplement)():293                                                    |
| Nosten 2016                   | 762 | No outcomes reported;                                                                                                                                                                                                                              | An Investigation of the Failure of Proguanil Prophylaxis                                                                                      | 1952. Trans Royal Soc Trop Med Hyg;46(6):653-5                                         |
| Ossi 1967                     | 489 | No outcomes reported; perspective piece; Contextual Factors; Uncontrolled before and after for pv, but pre-intervention and post-intervention includes cases (no denominators) in different populations. Insufficient info on outcomes to include. | [Elimination in South-East Asia? The role of antimalarial drugs]                                                                              | 2016. Elimination du paludisme en Asie du Sud-Est? Moyens medicamenteux.;200(3):4 67-6 |
| Ossi 1967 Pemberton-Ross 2016 | 761 | Duplicate 761                                                                                                                                                                                                                                      | An epidemic in the life of a malaria eradication programme                                                                                    | 1967. Bulletin of Endemic Diseases;9(44200):44334                                      |
| Pemberton-Ross 2017           | 806 | No outcomes reported; ASTMH abstract                                                                                                                                                                                                               | An epidemic in the life of malaria eradication programme.                                                                                     | 1967. Bulletin of Endemic Diseases;9():44334                                           |
| Pemberton-Ross 2017           | 56  | Modelling data;                                                                                                                                                                                                                                    | Reactive case detection for malaria elimination                                                                                               | 2016. AJTMH;95 (5 Supplement 1)():283                                                  |
| Pikul 1934                    | 528 | Intervention: not MDA- this is MTaT                                                                                                                                                                                                                | A stochastic model for the probability of malaria extinction by mass drug administration                                                      | 2017. Malaria journal;16(1):376                                                        |
|                               |     |                                                                                                                                                                                                                                                    | Experiment on the Prophylactic Use of Plasmocide in Daghestan with Observations on the Mosquito Infection Rate                                | 1934. Meditsinskaya Parazitologiya i Parazitarnye Bolezni;3(4):322-329 pp.             |



|               |     |                                                                       |                                                                                                                                                                                                      |                                                                        |
|---------------|-----|-----------------------------------------------------------------------|------------------------------------------------------------------------------------------------------------------------------------------------------------------------------------------------------|------------------------------------------------------------------------|
| Pikul 1934    | 805 | Duplicate;                                                            | Experiment on the prophylactic use of plasmocide in Daghestan with observations on the mosquito infection rate.                                                                                      | 1934. Meditsinskaya Parazitologiya i Parazitarnya Bolezni;3(4):322-329 |
| Porter 2016   | 87  | Duplicate;                                                            | Assessing associations between recent travel and malaria parasite prevalence during a mass drug administration campaign in southern zambia                                                           | 2016. AJTMH;95 (5 Supplement 1)():282                                  |
| Roberts 1956  | 745 | Design: <2 areas/clusters per group;                                  | Pyrimethamine (Daraprim) in the control of epidemic malaria                                                                                                                                          | 1956. J Trop Med Hyg;59(9):201-8                                       |
| Robinson 2015 | 600 | No outcomes reported; targeted MDA (to children)                      | Strategies for understanding and reducing the Plasmodium vivax and Plasmodium ovale hypnozoite reservoir in Papua New Guinean children: a randomised placebo-controlled trial and mathematical model | 2015. PLoS medicine;12(10):e1001891                                    |
| Roy 2013      | 395 | Intervention: not tx dose; Included in Mass relapse prevention review | The Potential Elimination of Plasmodium vivax Malaria by Relapse Treatment: Insights from a Transmission Model and Surveillance Data from NW India                                                   | 2013. PLoS Neglected Tropical Diseases;7 (1 (no pagination))(e1979):   |
| Runge 2020    | 625 | Modelling data;                                                       | Simulating the council-specific impact of anti-malaria interventions: A tool to support malaria strategic planning in Tanzania                                                                       | 2020. PloS one;15(2):e0228469                                          |
| Saarinen 1987 | 804 | Intervention: not MDA;                                                | Mass proguanil prophylaxis                                                                                                                                                                           | 1987. The Lancet;1(8539):985-986                                       |
| Selvaraj 2019 | 613 | Intervention: not MDA;                                                | Reducing malaria burden and accelerating elimination with long-lasting systemic insecticides: a modelling study of three potential use cases                                                         | 2019. Malaria journal;18(1):307                                        |
| Sergent 1913  | 758 | No outcomes reported                                                  | [English title not available]                                                                                                                                                                        | 1913. Ann. Inst. Pasteur;27(5):373-390                                 |
| Sergent 1913  | 801 | Duplicate 758                                                         | [Etudes epidemiologiques et prophylactiques du paludisme: neuvieme et dixieme campagnes en Algerie, en 1910 et 1911]                                                                                 | 1913. Annales de l'Institut Pasteur;27(5):373-390                      |
| Silal 2014    | 411 | Duplicate 681                                                         | Towards malaria elimination in Mpumalanga, South Africa: A metapopulation modeling approach                                                                                                          | 2014. AJTMH;1()():278                                                  |
| Silal 2014    | 681 | Modelling data; LINKED: 411-dup681                                    | Towards malaria elimination in Mpumalanga, South Africa: a population-level mathematical modelling approach                                                                                          | 2014. Malaria journal;13()():297                                       |
| Silal 2015    | 43  | No outcomes reported; Abstract only;                                  | Modelling mass drug administration in malaria endemic countries in the presence of imported infections                                                                                               | 2015. AJTMH;93 (4 Supplement)():289                                    |
| Silal 2015    | 255 | Intervention: not MDA;                                                | Predicting the impact of border control on malaria transmission: a simulated focal screen and treat campaign                                                                                         | 2015. Malaria journal;14()():268                                       |
| Silal 2015    | 457 | No outcomes reported;                                                 | Hitting a Moving Target: A Model for Malaria Elimination in the Presence of Population Movement                                                                                                      | 2015. PloS one;10(12):e0144990                                         |
| Silal 2017    | 106 | Contextual Factors; abstract only;                                    | Costing malaria elimination in the Asia-pacific                                                                                                                                                      | 2017. AJTMH;97 (5 Supplement 1)():332-333                              |
| Simeons       | 865 | Cross reference with outcomes; Simeons 1936                           | Follow-Up of a Mass Treatment with Injectable Atebrin                                                                                                                                                | 1938. Ind Med                                                          |

|                       |     |                                                                                                                            |  |                                                                                                                                                                                                                            |                                                                                                                                                                      |
|-----------------------|-----|----------------------------------------------------------------------------------------------------------------------------|--|----------------------------------------------------------------------------------------------------------------------------------------------------------------------------------------------------------------------------|----------------------------------------------------------------------------------------------------------------------------------------------------------------------|
| 1938                  |     | (included)                                                                                                                 |  |                                                                                                                                                                                                                            | Gaz;73(12):713-715<br>1953. Indian J<br>Malariol;7(1):27-31<br>1968. Bulletin of the<br>Indian Society for Malaria<br>and Other Communicable<br>Diseases;5():207-220 |
| Singh 1953            | 742 | Intervention: not tx dose;                                                                                                 |  | Suppressive treatment with amodiaquin                                                                                                                                                                                      |                                                                                                                                                                      |
| Singh 1968            | 800 | No outcomes reported                                                                                                       |  | Epidemiological study of focal outbreak of malaria in consolidation phase area and evaluation of remedial measures in Uttar Pradesh (India).                                                                               |                                                                                                                                                                      |
| Slater 2014           | 679 | Modelling data;                                                                                                            |  | The potential impact of adding ivermectin to a mass treatment intervention to reduce malaria transmission: a modelling study                                                                                               | 2014. J Inf<br>Dis;210(12):1972-80                                                                                                                                   |
| Smith 2019            | 621 | No outcomes reported;                                                                                                      |  | Resurgence of malaria infection after mass treatment: a simulation study                                                                                                                                                   | 2019. Malaria<br>journal;18(1):409                                                                                                                                   |
| Stuckey<br>2014       | 418 | Duplicate;                                                                                                                 |  | Investigating operational strategies for antimalarial drug administration in Zambia's Southern province: A simulation study                                                                                                | 2014. AJTMH;1():461                                                                                                                                                  |
| Toyb 2016             | 329 | Design: control group criteria not met                                                                                     |  | Le paludisme dans l'Archipel des Comores : État des lieux en 2015 après quinze années de lutte                                                                                                                             | 2016. Bull Soc Pathol<br>Exot;109(2):107-13<br>1961. Tropical<br>geographical<br>medicine;13(4):351-6                                                                |
| VanDijk<br>1961       | 862 | Intervention: not tx dose;                                                                                                 |  | Mass treatment of malaria with chloroquine. Results of a trial in Inanwatan                                                                                                                                                | 2015. AJTMH;93 (4<br>Supplement):476-477                                                                                                                             |
| Walker<br>2015        | 25  | Duplicate #475 Walker;                                                                                                     |  | Estimating the most resource-efficient malaria intervention packages and spatial scales to achieve elimination across Africa                                                                                               |                                                                                                                                                                      |
| Walker<br>2015        | 46  | Duplicate;                                                                                                                 |  | Estimated increase in malaria morbidity and mortality in EBOLA-affected countries due to decreased healthcare capacity and the potential impact of mitigation strategies                                                   | 2015. AJTMH;93 (4<br>Supplement):292                                                                                                                                 |
| Walker<br>2015        | 247 | Setting: emergencies/epidemics;                                                                                            |  | Malaria morbidity and mortality in Ebola-affected countries caused by decreased health-care capacity, and the potential effect of mitigation strategies: a modelling analysis                                              | 2015. The Lancet.<br>Infectious<br>diseases;15(7):825-32                                                                                                             |
| Walker<br>2016        | 475 | Modelling data;                                                                                                            |  | Estimating the most efficient allocation of interventions to achieve reductions in Plasmodium falciparum malaria burden and transmission in Africa: a modelling study                                                      | 2016. The Lancet. Global<br>health;4(7):e474-84                                                                                                                      |
| Wanzira<br>2018       | 131 | Duplicate; ASTMH Abstract ;                                                                                                |  | Community facilitators and barriers to a successful implementation of mass drug administration and indoor residual spraying for malaria prevention in Uganda                                                               | 2018. AJTMH;99 (4<br>Supplement):349                                                                                                                                 |
| Yukich<br>2016        | 76  | Duplicate;<br>Design: control group criteria not met; MDA given concomitantly with DDT spray rounds, no control group (Pf) |  | Cost-effectiveness of focal mass drug administration and mass drug administration with dihydroartemisinin-piperaquine for malaria prevention in Southern Province, Zambia: Results of a community randomized control trial | 2016. AJTMH;95 (5<br>Supplement 1):8                                                                                                                                 |
| Zulueta<br>1964       | 860 |                                                                                                                            |  | A Malaria Eradication Experiment in the Highlands of Kigezi (Uganda)                                                                                                                                                       | 1964. East Afr Med<br>J;41():102-20                                                                                                                                  |
| Lakshmana<br>charyulu | 767 | Intervention: not MDA                                                                                                      |  | Control of Malaria Epidemics in a River Valley project                                                                                                                                                                     | . ;():312-322                                                                                                                                                        |
| White 1937            | 793 | Intervention: not MDA; Abstract                                                                                            |  | Anti-gametocyte treatment combined with anti-larval malaria                                                                                                                                                                | 1937. Records of the                                                                                                                                                 |

|              |      |                                                                                                                    |                                                                                                                                                                                           |                                                                                                                 |
|--------------|------|--------------------------------------------------------------------------------------------------------------------|-------------------------------------------------------------------------------------------------------------------------------------------------------------------------------------------|-----------------------------------------------------------------------------------------------------------------|
|              |      |                                                                                                                    | control. Part II.                                                                                                                                                                         | Malaria Survey of India;7(4):221-231                                                                            |
| Xu 2022      | 920  | Contextual Factors;                                                                                                | Mass drug administration in response to vivax malaria resurgence in Anhui Province of Huanghuai Plain, China                                                                              | 2022. Advances in parasitology;116():115-152                                                                    |
| Li 2021      | 986  | Contextual Factors;                                                                                                | Seven decades towards malaria elimination in Yunnan, China                                                                                                                                | 2021. Malaria journal;20(1):147                                                                                 |
| Fehr 2021    | 965  | Contextual Factors;                                                                                                | From informed consent to adherence: factors influencing involvement in mass drug administration with ivermectin for malaria elimination in The Gambia                                     | 2021. Malaria journal;20(1):198                                                                                 |
| Keys 2021    | 988  | Contextual Factors;                                                                                                | Rapid ethnographic assessment for potential anti-malarial mass drug administration in an outbreak area of Santo Domingo, Dominican Republic                                               | 2021. Malaria journal;20(1):76                                                                                  |
| vanBeek 2021 | 953  | Modelling data;                                                                                                    | Model-based assessment of the safety of community interventions with primaquine in sub-Saharan Africa                                                                                     | 2021. Parasites & vectors;14(1):524                                                                             |
| Aung 2021    | 949  | Contextual Factors;                                                                                                | The acceptability of targeted mass treatment with primaquine for local elimination of vivax malaria in a northern Myanmar township: a mixed-methods study                                 | 2021. Parasites & vectors;14(1):549                                                                             |
| Cheng 2021   | 979  | Contextual Factors;                                                                                                | A systematic review of factors influencing participation in two types of malaria prevention intervention in Southeast Asia                                                                | 2021. Malaria journal;20(1):195                                                                                 |
| Fehr 2021    | 951  | Contextual Factors;                                                                                                | The role of social cohesion in the implementation and coverage of a mass drug administration trial for malaria control in the Gambia: An in-depth comparison of two intervention villages | 2021. Social science & medicine (1982);291():114487                                                             |
| Tian 2022    | 900  | Modelling data;                                                                                                    | Malaria elimination on Hainan Island despite climate change                                                                                                                               | 2022. Communications medicine;2():12                                                                            |
| Galatas 2021 | 983  | Contextual Factors;                                                                                                | Community acceptability to antimalarial mass drug administrations in Magude district, Southern Mozambique: A mixed methods study                                                          | 2021. PloS one;16(3):e0249080                                                                                   |
| Thomas 2021  | 975  | Imbalance of background interventions\                                                                             | The short-term impact of a malaria elimination initiative in Southern Mozambique: Application of the synthetic control method to routine surveillance data                                | 2021. Health economics;30(9):2168-2184                                                                          |
| Nadia 2022   | 966  | No outcomes reported;                                                                                              | Historical experiences on mass drug administration for malaria control and elimination, its challenges and China's experience: a narrative review                                         | 2022. Acta tropica;225():106209                                                                                 |
| Nct 2021     | 1078 | Awaiting classification;                                                                                           | Mass Drug Administration of Dihydroartemisinin-piperaquine + Single Low-dose Primaquine to Accelerate Toward Elimination Activities                                                       | 2021. <a href="https://clinicaltrials.gov/show/NCT04864444">https://clinicaltrials.gov/show/NCT04864444</a> (); |
| Liu 2022     | 923  | Design: control group criteria not met; no control, impossible to separate effect of MDA from other interventions; | Malaria from hyperendemicity to elimination along international borders in Yunnan, China during 2003-2020: a case study                                                                   | 2022. Infectious diseases of poverty;11(1):51                                                                   |
| Li 2021      | 924  | Design: <2 areas/clusters per group;                                                                               | Mass Drug Administration With Artemisinin-Piperaquine for the Elimination of Residual Foci of Malaria in Sao Tome Island                                                                  | 2021. Frontiers in medicine;8():617195                                                                          |

|             |      |                                                                                                                                                                                   |                                                                                                                                                                                                                 |                                                                            |
|-------------|------|-----------------------------------------------------------------------------------------------------------------------------------------------------------------------------------|-----------------------------------------------------------------------------------------------------------------------------------------------------------------------------------------------------------------|----------------------------------------------------------------------------|
| Liu 2020    | 1039 | No outcomes reported                                                                                                                                                              | Successful case studies on malaria elimination with multi-province cooperation in China                                                                                                                         | 2020. American Journal of Tropical Medicine and Hygiene;103(5 SUPPL)():221 |
| Wu 2020     | 1002 | No outcomes reported;                                                                                                                                                             | Sero-epidemiological evaluation of malaria transmission in The Gambia before and after mass drug administration                                                                                                 | 2020. BMC medicine;18(1):331                                               |
| Kyaw 2021   | 977  | Modelling data                                                                                                                                                                    | Estimating the programmatic cost of targeted mass drug administration for malaria in Myanmar                                                                                                                    | 2021. BMC public health;21(1):826                                          |
| Dabira 2022 | 932  | Imbalance of background interventions\                                                                                                                                            | Mass drug administration of ivermectin and dihydroartemisinin-piperaquine against malaria in settings with high coverage of standard control interventions: a cluster-randomised controlled trial in The Gambia | 2022. The Lancet. Infectious diseases;22(4):519-528                        |
| Druetz 2022 | 909  | Design: No pre-intervention data or control; Imbalance of background interventions; Kim Lindblade (2022-08-16 02:41:13)(Select): PRE-POST STUDY WITH NON-RANDOMIZED CONTROLS; IRS | Etramp5 as a useful serological marker in children to assess the immediate effects of mass drug campaigns for malaria                                                                                           | 2022. BMC infectious diseases;22(1):643                                    |
| Druetz 2022 | 919  | IMPLEMENTED AT SAME TIME AS MDA;                                                                                                                                                  | The Immediate Effects of a Combined Mass Drug Administration and Indoor Residual Spraying Campaign to Accelerate Progress Toward Malaria Elimination in Grande-Anse, Haiti                                      | 2022. The Journal of infectious diseases;225(9):1611-1620                  |
| Searle 2020 | 1040 | Irrelevant, no discussion of MDA;                                                                                                                                                 | Coverage, use, and impacts of plasmodium falciparum malaria prevention and control measures in rural sussundenga, Mozambique                                                                                    | 2020. American Journal of Tropical Medicine and Hygiene;103(5 SUPPL)():343 |

Notes: MDA = mass drug administration

In order to ensure that each population was captured only once, when there were multiple publications from a single study, only one paper was included, however, the relevant data from excluded papers was still captured. This is indicated as cross reference with outcomes. Studies which contributed to the contextual factor and modelling synthesis are highlighted in blue and yellow, respectively.

Supplementary table 3. Coverage of vector control co-interventions

| Study (location, years of study)                                   | Co-intervention           | IRS Coverage                                                                                        | ITN/LLIN coverage                                                                                  |
|--------------------------------------------------------------------|---------------------------|-----------------------------------------------------------------------------------------------------|----------------------------------------------------------------------------------------------------|
| <b>Cluster randomized trials</b>                                   |                           |                                                                                                     |                                                                                                    |
| von Seidlein 2003 <sup>35</sup><br>(Gambia, 1999)                  | MDA only                  |                                                                                                     |                                                                                                    |
| Shekalaghe 2011 <sup>23</sup><br>(Zanzibar, 2008)                  | ITN                       |                                                                                                     | Reported ITN use 25.1% to 36.1% (covers both intervention and comparison arms)                     |
| Morris 2018 <sup>22</sup><br>(Zanzibar, 2016-2017)                 | ITN and IRS               | Single round in March 2016 with pirimiphos methyl; 85% of households sprayed at baseline            | Universal distribution campaign in 2015-2016; self-reported ITN use among all ages 71% at baseline |
| von Seidlein 2019 <sup>28</sup><br>(Viet Nam, 2013-2014)           | LLINs                     |                                                                                                     | LLIN use reported by 81.5% overall; 84.4% in control and 78.5% in intervention arms                |
| von Seidlein 2019 <sup>28</sup><br>(Myanmar 2013-2014)             | LLINs                     |                                                                                                     | LLIN use reported by 81.5% overall; 84.4% in control and 78.5% in intervention arms                |
| von Seidlein 2019 <sup>28</sup><br>(Laos 2016-2017)                | LLINs                     |                                                                                                     | LLIN use reported by 81.5% overall; 84.4% in control and 78.5% in intervention arms                |
| von Seidlein 2019 <sup>28</sup><br>(Cambodia 2014-2016)            | LLINs                     |                                                                                                     | LLIN use reported by 81.5% overall; 84.4% in control and 78.5% in intervention arms                |
| Eisele 2020A <sup>21</sup> (Zambia, 2014-2017) (Low transmission)  | LLINs and IRS             | 6.9% in the MDA arm, 16.9% in control at baseline (2014); 42.2% in MDA and 47.8% in control by 2016 | 70.3% in MDA and 75.3% in control at baseline (2014) and 77.2% in MDA and 78.8% by 2016            |
| Eisele 2020B <sup>21</sup> (Zambia, 2014-2017) (High transmission) | LLINs and IRS             | 6.9% in the MDA arm, 16.9% in control at baseline (2014); 42.2% in MDA and 47.8% in control by 2017 | 70.3% in MDA and 75.3% in control at baseline (2014) and 77.2% in MDA and 78.8% by 2017            |
| McLean 2021 <sup>27</sup><br>(Myanmar, 2014 to 2017)               | LLIN                      |                                                                                                     | In all clusters, CHWs distributed LLINs (one per two people in each household)                     |
| <b>Non-randomized studies</b>                                      |                           |                                                                                                     |                                                                                                    |
| Simeons 1938 <sup>34</sup> (India, 1935)                           | Oiling for Larval Control |                                                                                                     |                                                                                                    |

|                                                          |                                    |                                                                                                               |  |
|----------------------------------------------------------|------------------------------------|---------------------------------------------------------------------------------------------------------------|--|
| Jones 1958 <sup>32</sup> (Kenya, 1952-1953)              | MDA only                           |                                                                                                               |  |
| Gabaldon 1959 <sup>31</sup> (Venezuela, 1956-1957)       | IRS                                | Coverage not specified                                                                                        |  |
| Schneider 1961 <sup>26</sup> (Burkina Faso, 1960-1961)   | Group 1: MDA only.<br>Group 2: IRS | Intervention group 2 only: Co-intervention with IRS using DDT once a year in May 1960, coverage not specified |  |
| Comer 1971 <sup>30</sup> (Panama, 1965-1968)             | MDA only                           |                                                                                                               |  |
| Paik 1974A <sup>33</sup> (Solomon Islands, 1972)         | IRS                                | "Total complete coverage" every 6 months                                                                      |  |
| Paik 1974B <sup>33</sup> (Solomon Islands, 1972-73)      | MDA only                           |                                                                                                               |  |
| Molineaux 1980 <sup>25</sup> (Nigeria, 1970-1976)        | IRS                                | ~99% coverage with IRS using propoxur 3-4 rounds per year in both intervention and comparison arms            |  |
| Cáceres García 2008 <sup>29</sup> (Venezuela, 2002-2007) | MDA only                           |                                                                                                               |  |

Supplementary table 4. GRADE Summary of Findings Tables

| Outcomes                                                                                | Studies and participants   | Rate ratio (95% CI)        | Anticipated absolute effects* (95% CI) |                                 | Certainty                 |
|-----------------------------------------------------------------------------------------|----------------------------|----------------------------|----------------------------------------|---------------------------------|---------------------------|
|                                                                                         |                            |                            | Risk with no MDA                       | Risk with MDA                   |                           |
| <b>Pf Mod-high transmission</b>                                                         |                            |                            |                                        |                                 |                           |
| AEs                                                                                     | 1 RCT<br>90 participants   | OR 3.25<br>(0.68 to 15.53) | 133 per 1,000<br>person-years          | 333 per 1,000<br>(95 to 705)    | Very low <sup>a,d</sup>   |
| <b>Pf low-very low transmission</b>                                                     |                            |                            |                                        |                                 |                           |
| SAEs, 0-3 months post MDA                                                               | 1 RCT<br>6911 participants | OR 3.61<br>(0.43 to 30.03) | 0 per 1,000<br>person-years            | 1 per 1,000<br>(0 to 11)        | Moderate <sup>d</sup>     |
| SAEs 4-12 months post MDA                                                               | 1 RCT<br>6911 participants | OR 1.47<br>(0.68 to 3.20)  | 3 per 1,000<br>person-years            | 5 per 1,000<br>(2 to 11)        | Moderate <sup>d</sup>     |
| Vomiting                                                                                | 1 RCT<br>703 participants  | OR 0.54<br>(0.19 to 1.54)  | 43 per 1,000<br>person-years           | 24 per 1,000<br>(8 to 65)       | Moderate <sup>d</sup>     |
| Drug resistance markers (PfKelch13) among Pf positive individuals 1-3 months post MDA   | 1 RCT<br>63 participants   | RR 0.82<br>(0.45 to 1.51)  | 608 per 1,000<br>person-years          | 498 per 1,000<br>(274 to 918)   | Very low <sup>a,d,k</sup> |
| Drug resistance markers (PfKelch13) among all samples 1-3 months post MDA               | 1 RCT<br>1232 participants | RR 0.13<br>(0.05 to 0.30)  | 64 per 1,000<br>person-years           | 8 per 1,000<br>(3 to 19)        | Low <sup>a,k</sup>        |
| Drug resistance markers (PfKelch13) among Pf positive individuals 4-12 months post MDA  | 1 RCT<br>75 participants   | RR 1.16<br>(0.83 to 1.61)  | 610 per 1,000<br>person-years          | 707 per 1,000<br>(506 to 982)   | Very low <sup>a,d,k</sup> |
| Drug resistance markers (PfKelch13) among all samples 4-12 months post MDA              | 1 RCT<br>2595 participants | RR 0.49<br>(0.28 to 0.85)  | 29 per 1,000<br>person-years           | 14 per 1,000<br>(8 to 24)       | Low <sup>a,k</sup>        |
| Drug resistance markers (PfKelch13) among Pf positive individuals 12-24 months post MDA | 1 RCT<br>78 participants   | RR 1.07<br>(0.82 to 1.40)  | 714 per 1,000<br>person-years          | 764 per 1,000<br>(586 to 1,000) | Very low <sup>a,d,k</sup> |
| Drug resistance markers (PfKelch13) among all samples 2-24 months post MDA              | 1 RCT<br>2990 participants | RR 0.66<br>(0.40 to 1.11)  | 25 per 1,000<br>person-years           | 17 per 1,000<br>(10 to 28)      | Low <sup>a,k</sup>        |
| <b>Pv</b>                                                                               |                            |                            |                                        |                                 |                           |
| SAEs, 0-3 months post MDA                                                               | 1 RCT<br>6911 participants | OR 3.61<br>(0.43 to 30.03) | 0 per 1,000<br>person-years            | 1 per 1,000<br>(0 to 11)        | Moderate <sup>h</sup>     |
| SAEs, 4-12 months post MDA                                                              | 1 RCT<br>6911 participants | OR 1.47<br>(0.68 to 3.20)  | 3 per 1,000<br>person-years            | 5 per 1,000<br>(2 to 11)        | Moderate <sup>h</sup>     |

Supplementary Figure 1a. Risk of bias for included studies; Randomized controlled trials

|                               | Domain 1a. | Domain 1b. | Domain 2. | Domain 3: Parasitemia Prevalence | Domain 3: Parasitemia Incidence | Domain 3: Incidence of Confirmed Malaria Illness | Domain 4: Parasitemia Prevalence | Domain 4: Parasitemia Incidence | Domain 4: Incidence of Confirmed Malaria Illness | Domain 5. | OVERALL: Parasitemia Prevalence | OVERALL: Parasitemia Incidence | OVERALL: Incidence of Confirmed Malaria Illness |
|-------------------------------|------------|------------|-----------|----------------------------------|---------------------------------|--------------------------------------------------|----------------------------------|---------------------------------|--------------------------------------------------|-----------|---------------------------------|--------------------------------|-------------------------------------------------|
| Cáceres Garcia 2008 Venezuela | +          |            | +         |                                  |                                 | -                                                |                                  |                                 | -                                                | -         |                                 |                                | -                                               |
| Comer 1971 Panama             | -          |            | +         | +                                |                                 |                                                  | +                                |                                 |                                                  | -         | -                               |                                |                                                 |
| Eisele 2020 Zambia A          | +          | +          | +         | +                                | +                               | +                                                | +                                | +                               | ?                                                | +         | +                               | +                              | ?                                               |
| Eisele 2020 Zambia B          | +          | +          | +         | +                                | +                               | +                                                | +                                | +                               | ?                                                | +         | +                               | +                              | ?                                               |
| Gabalton 1959 Venezuela       | ?          |            | ?         |                                  | +                               |                                                  |                                  | +                               |                                                  | -         |                                 | -                              |                                                 |
| Jones 1954 Kenya              | ?          |            | +         | +                                |                                 |                                                  | +                                |                                 |                                                  | -         | -                               |                                |                                                 |
| McLean 2021 Myanmar           | +          | +          | ?         | -                                |                                 |                                                  | +                                |                                 |                                                  | +         | -                               |                                |                                                 |
| Molineaux 1980 Nigeria        | +          |            | +         | +                                |                                 |                                                  | +                                |                                 |                                                  | ?         | ?                               |                                |                                                 |
| Morris 2018 Zanzibar          | ?          | +          | +         | +                                |                                 | +                                                | +                                |                                 | ?                                                | +         | ?                               |                                | ?                                               |
| Paik 1974 Solomon Islands A   | +          |            | +         | ?                                | ?                               |                                                  | +                                | +                               |                                                  | -         | -                               | -                              |                                                 |
| Paik 1974 Solomon Islands B   | +          |            | +         |                                  | ?                               |                                                  |                                  |                                 | -                                                | -         |                                 | -                              |                                                 |
| Schneider 1961 Burkina Faso   | ?          |            | +         | +                                |                                 |                                                  | +                                |                                 |                                                  | ?         | ?                               |                                |                                                 |
| Shekalaghe 2011 Tanzania      | +          | +          | +         | +                                |                                 | +                                                | +                                |                                 | +                                                | +         | +                               |                                | +                                               |
| Simeons 1938 India            | +          |            | +         |                                  |                                 | -                                                |                                  |                                 | -                                                | -         |                                 |                                | -                                               |
| von Seidlein 2003 Gambia      | +          | +          | +         | +                                | -                               |                                                  | +                                | +                               |                                                  | +         | +                               | -                              |                                                 |
| von Seidlein 2019 Cambodia    | ?          | +          | +         | +                                |                                 | +                                                | +                                |                                 | ?                                                | +         | ?                               |                                | ?                                               |
| von Seidlein 2019 Laos        | ?          | +          | +         | +                                |                                 |                                                  | +                                |                                 |                                                  | +         | ?                               |                                |                                                 |
| von Seidlein 2019 Myanmar     | ?          | +          | +         | +                                |                                 | +                                                | +                                |                                 | ?                                                | +         | ?                               |                                | ?                                               |
| von Seidlein 2019 Viet Nam    | +          | +          | ?         | +                                |                                 |                                                  | +                                |                                 |                                                  | +         | ?                               |                                |                                                 |

**Randomized studies:** ROB2 tool: Domain 1a. Risk of bias arising from randomization; Domain 1b. Risk of bias from timing of identification/ recruitment; Domain 2. Risk of bias due to deviations from intended intervention; Domain 3. Missing outcome data; Domain 4. Risk of bias in measurement of the outcome; Domain 5. Risk of bias in selection of reported result.



| Study                                  | Risk of bias domains |     |    |    |    |    | Overall |
|----------------------------------------|----------------------|-----|----|----|----|----|---------|
|                                        | D1                   | D1b | D2 | D3 | D4 | D5 |         |
| Eisele 2020 ZambiaA (AE)               | +                    | +   | +  | ⊗  | -  | +  | ⊗       |
| Eisele 2020 ZambiaB (AE)               | +                    | +   | +  | ⊗  | -  | +  | ⊗       |
| Morris 2018 Zanzibar (AE)              | +                    | +   | +  | ⊗  | -  | +  | ⊗       |
| McLean 2021 Myanmar (AE)               | +                    | +   | +  | ⊗  | +  | +  | ⊗       |
| McLean 2021 Myanmar (Resistance)       | +                    | +   | +  | -  | +  | +  | -       |
| Shekalaghe 2011 TZA (AE)               | +                    | +   | +  | +  | +  | +  | +       |
| von Seidlein 2003 Gambia (AE)          | +                    | +   | +  | +  | +  | +  | +       |
| von Seidlein 2019 SE Asia (AE)         | +                    | +   | +  | ⊗  | +  | +  | ⊗       |
| von Seidlein 2019 SE Asia (Resistance) | +                    | +   | +  | ⊗  | +  | +  | ⊗       |

Domains:  
D1 : Bias arising from the randomization process.  
D1b: Bias arising from the timing of identification and recruitment of individual participants in relation to timing of randomization.  
D2 : Bias due to deviations from intended intervention.  
D3 : Bias due to missing outcome data.  
D4 : Bias in measurement of the outcome.  
D5 : Bias in selection of the reported result.

Judgement  
⊗ High  
- Some concerns  
+ Low

Supplementary Figure 1b. Risk of bias for included studies; Non-randomized trials

**Non-randomized studies:** Domain 1. Failure to develop and apply appropriate eligibility criteria (inclusion of control population); Domain 1b. Not applicable; Domain 2. Flawed measurement of exposure; Domain 3. Incomplete follow-up; Domain 4. Flawed measurement of outcome (outcome-level); Domain 5. Failure to adequately control for confounding.

Supplementary Figure 2. Prevalence of *P. falciparum* parasitemia in moderate- high transmission settings, Nonrandomized Trials

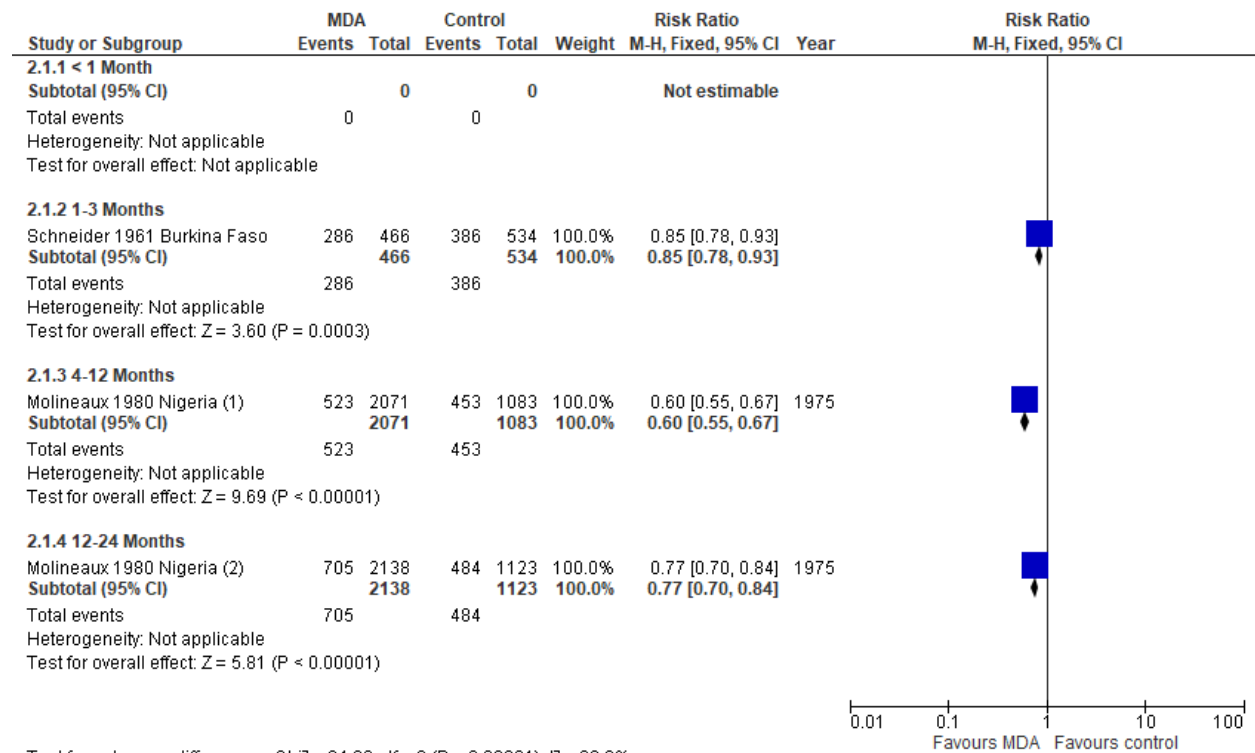

Test for subgroup differences: Chi<sup>2</sup> = 24.88, df = 2 (P < 0.00001), I<sup>2</sup> = 92.0%

**Footnotes**

- (1) Molineaux 1980 NGA: MDA (SP every 2 weeks during the wet season and 10 weeks during the dry season) + IRS vs. no intervention
- (2) Molineaux 1980 NGA: MDA (SP every 2 weeks during the wet season and 10 weeks during the dry season) + IRS vs. no intervention

Supplementary Figure 3. Incidence of clinical *P. falciparum* malaria in moderate- high transmission settings, cRCTs

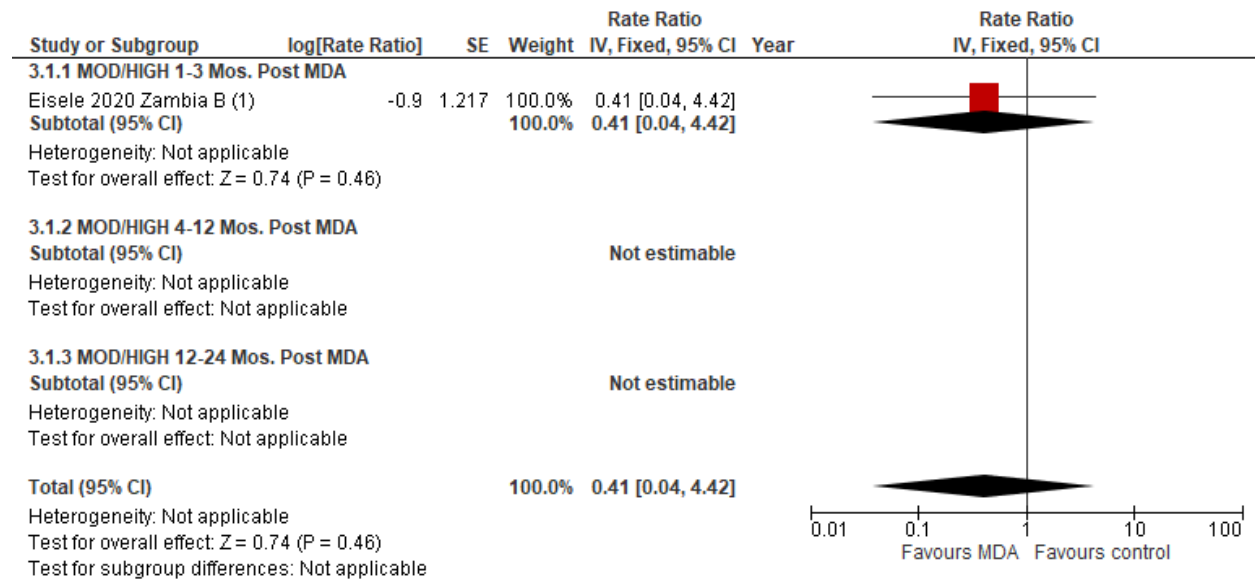

**Footnotes**

(1) All ages; January-May 2015 and 2016; denominator assumed to be average of 2015 and 2016 mid-year HFCA population

Supplementary figure 4. Incidence of clinical *P. falciparum* malaria in low-very low transmission settings, cRCTs

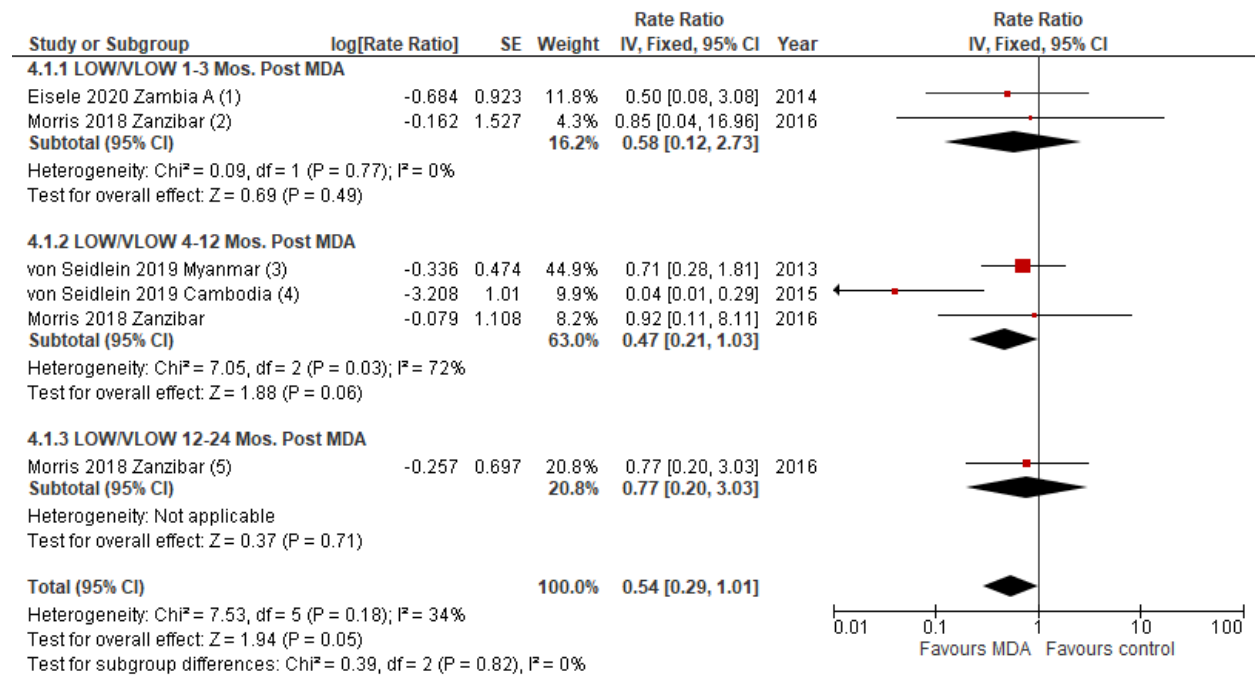

Footnotes

- (1) All ages; January-May 2015 and 2016; denominator assumed to be average of 2015 and 2016 mid-year HFCA population
- (2) All ages; May-August 2016
- (3) All ages; May 2013 to January 2014; *Plasmodium falciparum* or mixed infections
- (4) All ages; July 2015 - June 2016; *Plasmodium falciparum* or mixed infections
- (5) All ages; May 2016 - August 2017

Supplementary figure 5. Incidence of *P. vivax* malaria, Non-randomized trials

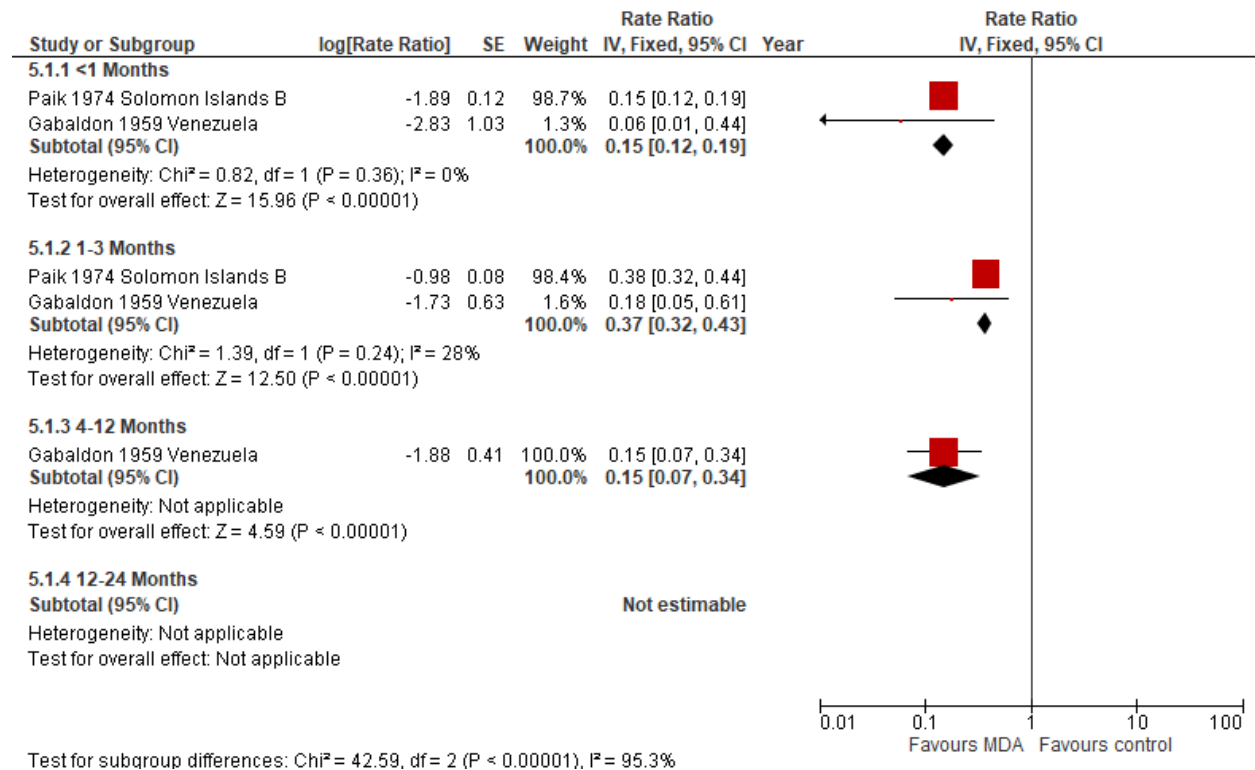

## Supplementary figure 6. Prevalence of *P. vivax* malaria, Non-randomized trials

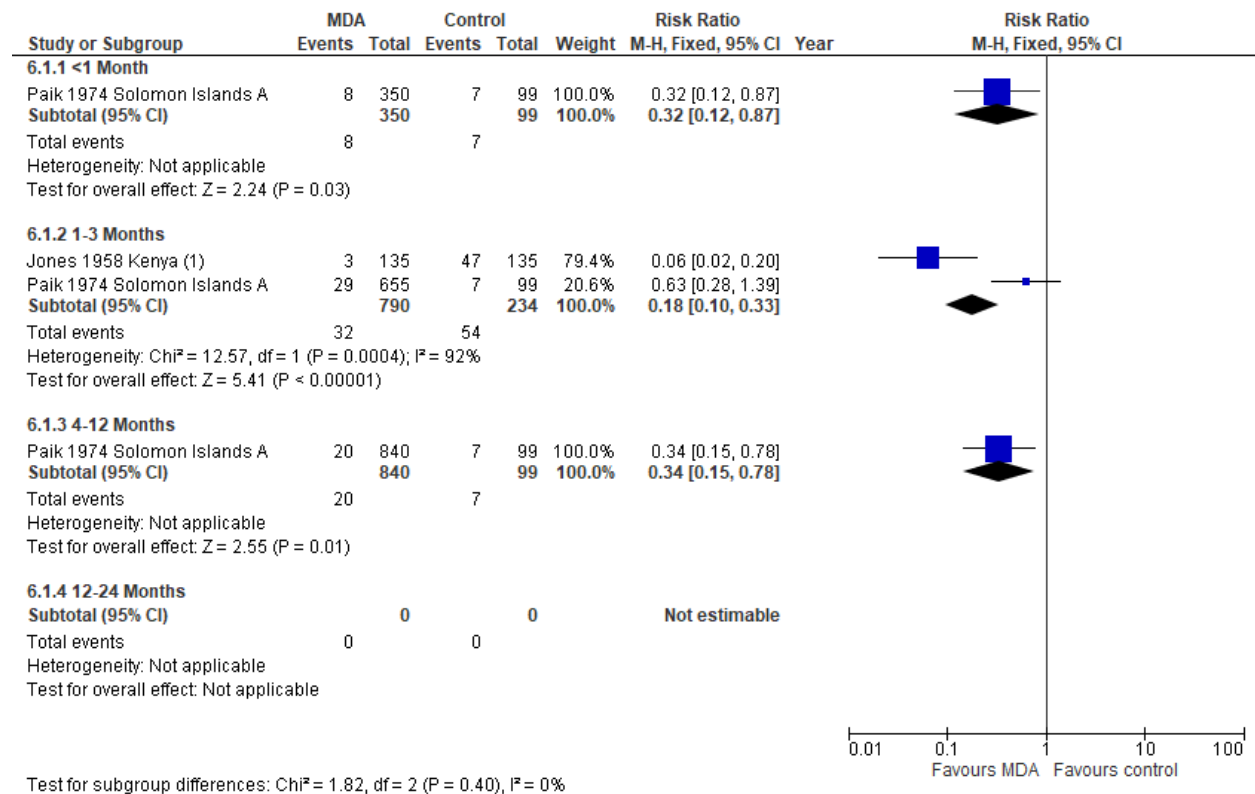

### Footnotes

(1) Jones 1954 KEN: MDA (Pyr every 6 months for 3 rounds) vs. baseline data

## Supplementary figure 7. Incidence of clinical *P. vivax* malaria, cRCTs

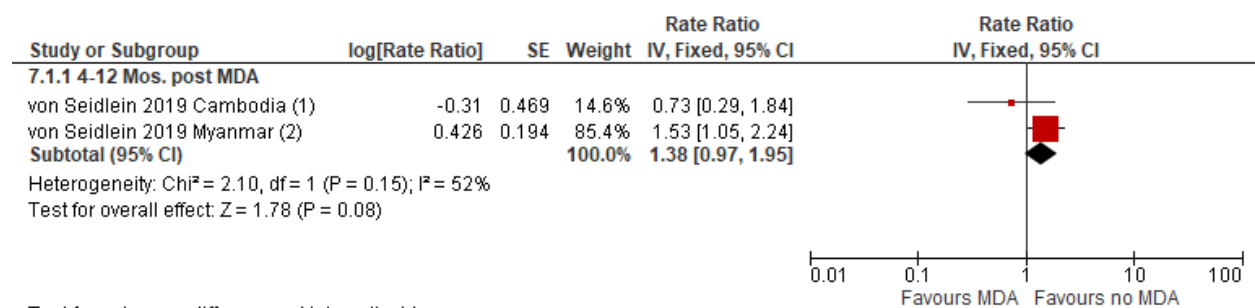

### Footnotes

(1) All ages; July 2015 - June 2016; *Plasmodium vivax*

(2) All ages; May 2013 to January 2014; *Plasmodium vivax*

Supplementary figure 8. Incidence of clinical *P. vivax* malaria, Non-randomized trials

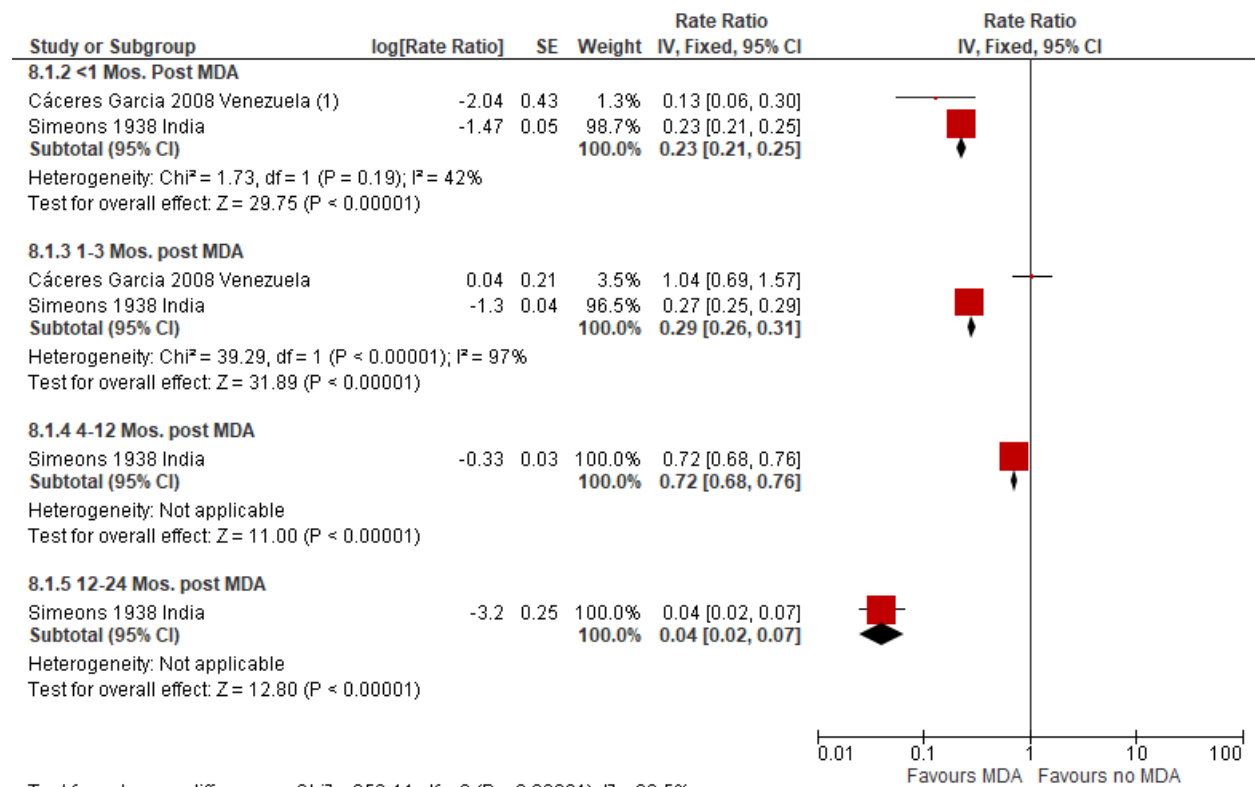

Test for subgroup differences: Chi<sup>2</sup> = 653.44, df = 3 (P < 0.00001), I<sup>2</sup> = 99.5%

Footnotes

(1) Cáceres Garcia 2008 VEN: MDA (CQ+PQ once only) vs. baseline data

Supplementary figure 9. Serious Adverse Events (Pf and Pv)

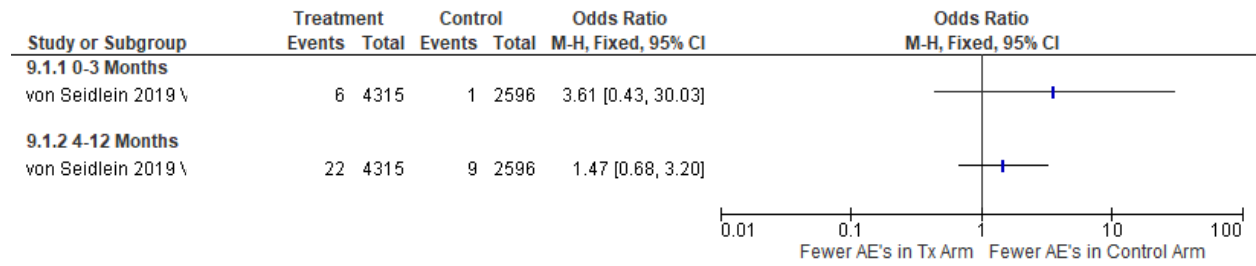

Supplementary figure 10. Proportion of samples with the PfKelch13 mutation among all samples\*

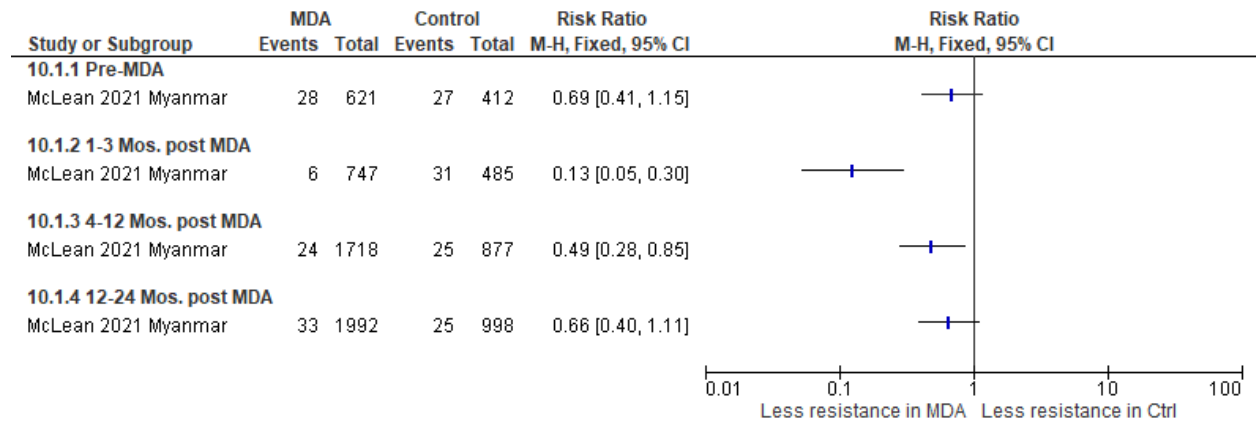

\*Data on actual number of samples collected was only available for the pre-MDA and 3 month post MDA time point, for the 4-12 and 12-24 month time points, we used the total number surveyed as the denominator. Numbers from the 5 and 10 month surveys were combined for the 4-12 month period, and numbers from the 15 and 21 month surveys were combined for the 12-24 month period.



Supplementary figure 11. Proportion of samples with the PfKelch13 mutation among Pf positive samples

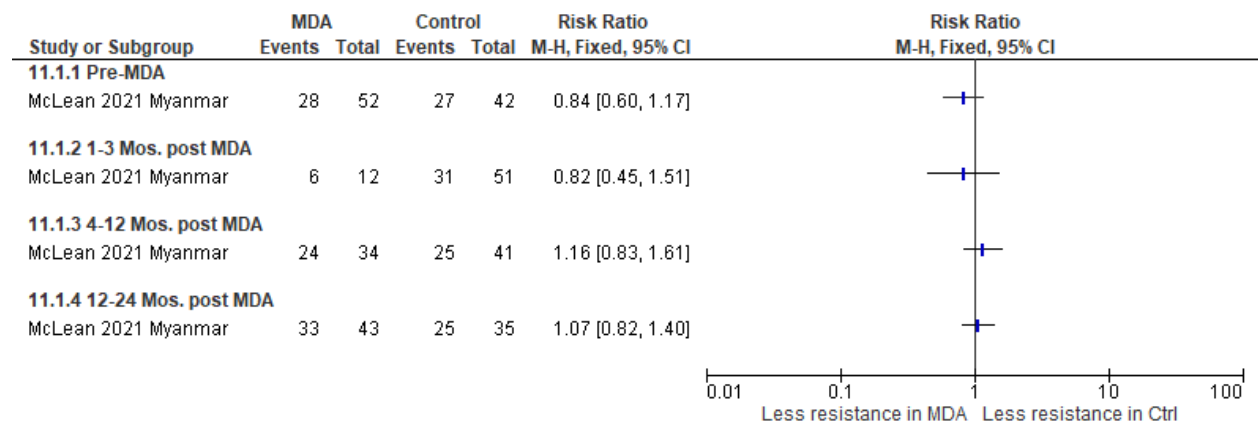

Supplement: tpmd220766.SD1.pdf [file tpmd220766.SD1.pdf]
